# Supplementary material for: Examining the Flourishing Impacts of Repeated Visits to a Virtual Art Museum and the Role of Immersion
Source: MDPI journal article supplement (doi:10.3390/bs12120500), 2022-12-07
Supplement: s1 [file s1]

## Supplementary Materials

Supplementary Table S1.

*Details for artworks in the virtual galleries*

| <b>Title</b>                                                                                                                        | <b>Date</b>         | <b>Artist</b>                                     |
|-------------------------------------------------------------------------------------------------------------------------------------|---------------------|---------------------------------------------------|
| <i>Technical Screening Gallery</i>                                                                                                  |                     |                                                   |
| Dances at the Spring                                                                                                                | 1912                | Francis Picabia                                   |
| Dog Barking at the Moon                                                                                                             | 1926                | Joan Miro                                         |
| Fantasia No. 5                                                                                                                      | 1973                | Maya Schock                                       |
| Old Woman Reading                                                                                                                   | 1621-1623           | Jan Lievens                                       |
| Saint Thomas Receiving the Virgin's Belt with Saints Michael Archangel, Augustine, Margaret of Antioch, and Catherine of Alexandria | 1467                | Neri di Bicci                                     |
| Soldiers beside a Fireplace                                                                                                         | 1628-1632           | Willem Cornelisz                                  |
| Still Life with a Tortoise                                                                                                          | 1743                | Possibly by Thomas Black                          |
| Tsakali of Five-Fold Throne of the Tathagatha                                                                                       | 18th - 19th century | Artist/maker unknown, Tibetan                     |
| Vriksha (Tree) Pichhwai                                                                                                             | 18th century        | Artist/maker unknown, Indian                      |
| Xanadu                                                                                                                              | 1972                | Murray Dessner                                    |
| <i>Week 1 Gallery</i>                                                                                                               |                     |                                                   |
| A Critic and his Artist Friends (Portrait of Christian Brinton and Nine Artists)                                                    | 1924                | David Davidovich Burliuk                          |
| A Gift Not Given                                                                                                                    | 1981                | Alexandria Lerner                                 |
| Abstraction                                                                                                                         | 1939-1944           | Ad Reinhardt                                      |
| Bedroom Painting No. 7                                                                                                              | 1967-1969           | Tom Wesselmann                                    |
| Bellowing Bull                                                                                                                      | 17th century        | Copy after Paulus Potter                          |
| Camouflage Self-Portrait                                                                                                            | 1986                | Andy Warhol                                       |
| Composition                                                                                                                         | 1940                | Suzy Frelinghuysen (Estelle Condit Frelinghuysen) |
| Coppers                                                                                                                             | 1960                | Juan Mingorance                                   |
| Cow and Calf                                                                                                                        | 1929                | George Biddle                                     |
| England                                                                                                                             | Date unknown        | Ellis Ruley                                       |
| Garbo Dance Around the Tree of Life                                                                                                 | 18th century        | Artist/maker unknown, Indian                      |
| Grass                                                                                                                               | 2000                | Howard Hodgkin                                    |

|                                                                                   |              |                                 |
|-----------------------------------------------------------------------------------|--------------|---------------------------------|
| Jain Cosmogram                                                                    | 1700         | Artist/maker unknown, Indian    |
| John Fitzgerald Kennedy                                                           | 1962-1963    | Sergio Lombardo                 |
| Lotus                                                                             | 1960         | Guo Dawei (David Kwo)           |
| Maharao Ratan of Bundi Attop His Horse                                            | 1680         | Artist/maker unknown, Indian    |
| Maine Landscape No. 27                                                            | 1909         | Marsden Hartley                 |
| Mountains                                                                         | 1910-1911    | Marguerite Thompson Zorach      |
| Ocean Liner in New York                                                           | Date unknown | Justin McCarthy                 |
| Pekingese                                                                         | 1909         | Sir Alfred Munnings             |
| Private Aquarium                                                                  | 1959         | Abraham P. Hankins              |
| Still Life with Apples and a Glass of Wine                                        | 1877-1879    | Paul Cezanne                    |
| Still Life: Mountain Dew                                                          | 1827         | Chester Harding                 |
| Study for "Franklin's Footpath"                                                   | 1971         | Gene Davis                      |
| Thakur Balwant Singh Presides at a Dance Performance                              | 1890         | Attributed to Mohan Lal, Indian |
| The Birth of Venus                                                                | 1635 or 1636 | Nicolas Poussin                 |
| The Ocean Seen from the Corridor                                                  | 2006         | Trevor Winkfield                |
| Untitled                                                                          | 1955-1986    | Emery Blagdon                   |
| Untitled (Bird Arabesque)                                                         | 1933         | Rabindranath Tagore             |
| Whoopee at Sloppy Jo's                                                            | 1933         | George Biddle                   |
| <i>Week 2 Gallery</i>                                                             |              |                                 |
| A Bum Bock                                                                        | 1857         | Artist/maker unknown            |
| Album Paintings of Household Gods: the Vanguard with White Horse (Baima xianfeng) | 1900         | Zhou Peichun                    |
| Animal Caught in a Trap                                                           | 1929         | Andre Masson                    |
| Beth                                                                              | 1960         | Morris Louis                    |
| Bull Fight                                                                        | 1985         | William L. Hawkins              |
| Christ Healing a Lunatic and Judas Receiving Thirty Pieces of Silver              | 1425-1426    | Francesco d'Antonio             |
| Compost with Bean Pod                                                             | 1998-2004    | Emily Brown                     |
| Elijah in the Desert                                                              | 1834         | Moritz Berendt                  |
| Fight Between a Man and a Tiger                                                   | 20th century | Artist/maker unknown, Indian    |
| Girl with a Mask                                                                  | 1945         | Juan Soriano                    |
| Horse, Pipe, and Red Flower                                                       | 1920         | Joan Miro                       |
| Hound Coursing a Stag                                                             | 1762         | George Stubbs                   |

|                                                                            |                   |                                          |
|----------------------------------------------------------------------------|-------------------|------------------------------------------|
| Improvisation No. 29 (The Swan)                                            | 1912              | Vasily Kandinsky                         |
| Krishna Shares Food with Balarama and the Cowherds during the Rainy Season | 1570-1575         | Artist/maker unknown, Indian             |
| Night Sea                                                                  | 1977              | Edna Andrade                             |
| Nomad with a Tribute Horse                                                 | 19th century      | Artist/maker unknown, Chinese            |
| Painting                                                                   | 1933              | Joan Miro                                |
| Portrait of Marian and Betty                                               | 1970              | Beauford Delaney                         |
| Purple Lips                                                                | 1912              | Alexey von Jawlensky                     |
| Rift                                                                       | 5-Jun             | Odili Donald Odita                       |
| Scene in a Tavern                                                          | 17th century      | Adriaen Brouwer                          |
| Still Life                                                                 | 1850              | Artist/maker unknown, American           |
| Still Life with Peaches                                                    | 1927              | Luigi Lucioni                            |
| Still Life with Roses of Dijon                                             | 1882              | Ignace-Henri-Jean-Theodore Fantin-Latour |
| Summer Landscape                                                           | 1964              | Roland Conrad Petersen                   |
| Taboo                                                                      | 1963              | Jacob Lawrence                           |
| The City                                                                   | 1919              | Fernand Leger                            |
| Three Nudes (The Aunts)                                                    | 1930              | Julio Castellanos                        |
| Truth Rescued from Romance                                                 | 1980              | Katherine Porter                         |
| Wood Interior                                                              | 1914              | Man Ray                                  |
| <i>Week 3 Gallery</i>                                                      |                   |                                          |
| A Rooster and a Hen Fighting                                               | 17th century      | Follower of Melchior de Hondecoeter      |
| Album Paintings of Household Gods: God of Happiness                        | 1900              | Zhou Peichun                             |
| Aux Enfants                                                                | 1960              | Abraham P. Hankins                       |
| Bad Reception                                                              | 1976              | William Schwedler                        |
| Boats, Gloucester                                                          | 1917              | Stuart Davis                             |
| Brown Shapes White                                                         | 1941              | Alice Trumbull Mason                     |
| Bullfight                                                                  | 1934              | Pablo Ruiz y Picasso                     |
| Cultivated Pursuits                                                        | Late 19th century | Artist/maker unknown, Chinese            |
| Daily Domestic Arguments                                                   | 1913              | Leonardo Dudreville                      |
| Gayety Burlesk                                                             | 1932              | Reginald Marsh                           |
| Hammer                                                                     | 1981              | Peter Nadin                              |
| Landscape                                                                  | 1670              | Liu Du                                   |
| Little Painting with Yellow (Improvisation)                                | 1914              | Vasily Kandinsky                         |
| Nude Reclining by the Sea                                                  | 1868              | Gustave Courbet                          |
| Pertaining to Yachts and Yachting                                          | 1922              | Charles Sheeler                          |
| Portrait of the Widow Marion Knapp [née Graham, later Baroness Bateman]    | 1903              | Franz von Lenbach                        |

|                                                                   |              |                                     |
|-------------------------------------------------------------------|--------------|-------------------------------------|
| Reclining Nude                                                    | 1976         | Tommy Dale Palmore                  |
| Self-Portrait                                                     | 1975         | Martha Mayer Erlebacher             |
| Stream in Winter                                                  | 1940         | Walter Elmer Schofield              |
| Study of Three Heads                                              | 1870         | Henri Regnault                      |
| The Bandaged Night                                                | 1956         | William Scharf                      |
| The Battle of the USS "Kearsarge" and the CSS "Alabama"           | 1864         | Edouard Manet                       |
| The Departure                                                     | 1951         | Grandma Moses (Anna Mary Robertson) |
| The Dessert                                                       | 1877-1879    | Paul Cezanne                        |
| The Emblem of Christ Appearing to Constantine                     | 1622         | Peter Paul Rubens                   |
| The Fatal Temple                                                  | 1914         | Giorgio de Chirico                  |
| The Hermitage                                                     | 1924         | Joan Miro                           |
| Trying to find our spot off in that light, light off in that spot | 2014         | Jayson Musson                       |
| View                                                              | 2000         | John Moore                          |
| Wounded Stag                                                      | 19th century | Imitator of Gustave Courbet         |
| Week 4 Gallery                                                    |              |                                     |
| Album Paintings of Household Gods: Heavenly King Virupaksa        | 1900         | Zhou Peichun                        |
| Cockfight                                                         | 1930         | Andre Masson                        |
| Composition                                                       | 1933         | Jean Helion                         |
| Don't Drink the Water                                             | 1968         | David Pease                         |
| Egg Rocker                                                        | 1952         | Alan Davie                          |
| Elegy to the Spanish Republic                                     | 1958-1961    | Robert Motherwell                   |
| Elephant in Battle                                                | 1750-1770    | Artist/maker unknown, Indian        |
| Favorite Chestnut Hunter of Lady Frances Pierrepont               | 1799         | Benjamin Marshall                   |
| Girl Combing Her Hair                                             | 1910         | Max Pechstein                       |
| Marriage Painting                                                 | 20th century | Warli people, Indian                |
| Mocking of Christ                                                 | 1454         | Joan Reixach                        |
| Musicians                                                         | Date unknown | Jon Serl                            |
| New Mexico Landscape                                              | 1919-1920    | Marsden Hartley                     |
| Pennsylvania Landscape                                            | 1925         | Charles Sheeler                     |
| Playing Card Depicting the Goddess Durga                          | 1800-1825    | Artist/maker unknown, Indian        |
| Portrait of John Hart                                             | 1798         | Charles Peale Polk                  |
| Present Futures                                                   | 2006         | Moe Brooker                         |

|                                          |                         |                                                 |
|------------------------------------------|-------------------------|-------------------------------------------------|
| Rock and Anchor                          | 1961                    | Morris Atkinson<br>Blackburn                    |
| Still Life: Cyclamen                     | 1925                    | Vera M. White                                   |
| The Beach, Newport (In the Sand)         | 1919                    | George Bellows                                  |
| The Death of Sardanapalus                | 1844                    | Ferdinand-Victor-<br>Eugene Delacroix           |
| The Deposition                           | 1961                    | Bob Thompson                                    |
| The Lament of Aminta                     | 1610-<br>1615           | Bartolomeo Cavarozzi                            |
| The Nativity and the Arrival of the Magi | Late<br>15th<br>century | Artist/maker<br>unknown, active<br>Crete, Greek |
| The Orchard Window                       | 1918                    | Daniel Garber                                   |
| The passage of the bride II              | 2004                    | Richard Hamilton                                |
| Untitled Painting #10                    | 1963                    | Robert Ryman                                    |
| Untitled XXI                             | 1982                    | Attributed to Willem<br>de Kooning              |
| View of the Yare                         | 19th<br>century         | Artist/maker<br>unknown, English                |
| Winter Landscape                         | Late<br>1660s           | Jacob Isaacksz. van<br>Ruisdael                 |

Supplementary Table S2.

*Descriptive statistics for the well-being variables*

| Variable                    | Pre-Intervention |      |                     | Post-Intervention |      |                     |
|-----------------------------|------------------|------|---------------------|-------------------|------|---------------------|
|                             | Mean             | SD   | Cronbach's $\alpha$ | Mean              | SD   | Cronbach's $\alpha$ |
| Support                     | 4.13             | 0.76 | 0.86                | 4.17              | 0.76 | 0.87                |
| Community                   | 3.23             | 0.95 | 0.76                | 3.20              | 0.95 | 0.79                |
| Trust                       | 3.37             | 0.84 | 0.84                | 3.37              | 0.87 | 0.86                |
| Respect                     | 3.73             | 0.78 | 0.81                | 3.75              | 0.79 | 0.82                |
| Loneliness                  | 2.17             | 1.03 | 0.82                | 2.16              | 1.06 | 0.85                |
| Belonging                   | 3.25             | 0.96 | 0.85                | 3.28              | 0.99 | 0.88                |
| Engagement                  | 3.91             | 0.67 | 0.69                | 3.92              | 0.68 | 0.71                |
| Skills                      | 3.52             | 0.93 | 0.86                | 3.51              | 0.93 | 0.87                |
| Learning                    | 3.81             | 0.85 | 0.75                | 3.87              | 0.84 | 0.78                |
| Accomplishment              | 3.22             | 1.01 | 0.92                | 3.22              | 1.04 | 0.93                |
| Self-Efficacy               | 3.94             | 0.79 | 0.82                | 3.93              | 0.83 | 0.84                |
| Self-Worth                  | 3.59             | 0.93 | 0.85                | 3.61              | 0.95 | 0.88                |
| Control                     | 4.10             | 0.84 | 0.83                | 4.06              | 0.88 | 0.85                |
| Meaning                     | 3.57             | 1.05 | 0.91                | 3.58              | 1.06 | 0.92                |
| Optimism                    | 3.61             | 1.00 | 0.90                | 3.61              | 0.98 | 0.90                |
| Life Satisfaction           | 3.25             | 1.06 | 0.92                | 3.24              | 1.06 | 0.92                |
| Positive Feelings           | 3.53             | 1.02 | 0.94                | 3.49              | 1.03 | 0.95                |
| Negative Feelings           | 2.04             | 1.08 | 0.93                | 2.09              | 1.10 | 0.93                |
| Overall Thriving            | 3.89             | 0.84 | 0.97                | 3.86              | 0.86 | 0.98                |
| Stress                      | 1.85             | 0.84 | 0.90                | 1.84              | 0.86 | 0.91                |
| Depression                  | 1.77             | 0.96 | 0.95                | 1.76              | 0.97 | 0.95                |
| Anxiety                     | 1.44             | 0.66 | 0.86                | 1.45              | 0.68 | 0.88                |
| Relatedness Satisfaction    | 3.60             | 0.97 | 0.88                | 3.59              | 1.01 | 0.89                |
| Relatedness Dissatisfaction | 2.24             | 0.99 | 0.70                | 2.19              | 1.00 | 0.74                |
| Autonomy Satisfaction       | 3.65             | 0.78 | 0.75                | 3.65              | 0.80 | 0.79                |
| Autonomy Dissatisfaction    | 2.32             | 0.93 | 0.72                | 2.41              | 0.97 | 0.74                |
| Competency Satisfaction     | 3.35             | 0.86 | 0.81                | 3.37              | 0.87 | 0.83                |
| Competency Dissatisfaction  | 2.31             | 1.04 | 0.81                | 2.28              | 1.02 | 0.81                |
| Relatedness Overall         | 1.36             | 1.69 | 0.82                | 1.41              | 1.79 | 0.85                |
| Autonomy Overall            | 1.32             | 1.50 | 0.79                | 1.25              | 1.58 | 0.83                |
| Competency Overall          | 1.04             | 1.57 | 0.79                | 1.10              | 1.58 | 0.81                |

Supplementary Table S3.

*Correlations among well-being variables pre-intervention (upper diagonal) and post-intervention (lower diagonal)*

|                                 | 1     | 2     | 3     | 4     | 5     | 6     | 7     | 8     | 9     | 10    |
|---------------------------------|-------|-------|-------|-------|-------|-------|-------|-------|-------|-------|
| 1. Support                      | ---   | 0.30  | 0.44  | 0.57  | -0.65 | 0.50  | 0.33  | 0.41  | 0.25  | 0.41  |
| 2. Community                    | 0.36  | ---   | 0.39  | 0.39  | -0.32 | 0.54  | 0.30  | 0.43  | 0.19  | 0.41  |
| 3. Trust                        | 0.44  | 0.45  | ---   | 0.49  | -0.40 | 0.57  | 0.30  | 0.34  | 0.20  | 0.41  |
| 4. Respect                      | 0.61  | 0.44  | 0.53  | ---   | -0.55 | 0.56  | 0.37  | 0.54  | 0.20  | 0.51  |
| 5. Loneliness                   | -0.66 | -0.41 | -0.38 | -0.56 | ---   | -0.54 | -0.29 | -0.44 | -0.18 | -0.53 |
| 6. Belonging                    | 0.48  | 0.60  | 0.55  | 0.60  | -0.55 | ---   | 0.34  | 0.47  | 0.23  | 0.54  |
| 7. Engagement                   | 0.38  | 0.37  | 0.31  | 0.41  | -0.34 | 0.34  | ---   | 0.47  | 0.37  | 0.40  |
| 8. Skills                       | 0.40  | 0.45  | 0.37  | 0.54  | -0.44 | 0.48  | 0.49  | ---   | 0.33  | 0.66  |
| 9. Learning                     | 0.33  | 0.25  | 0.27  | 0.33  | -0.25 | 0.25  | 0.36  | 0.30  | ---   | 0.22  |
| 10. Accomplishment              | 0.45  | 0.47  | 0.41  | 0.57  | -0.55 | 0.54  | 0.40  | 0.68  | 0.30  | ---   |
| 11. Self-Efficacy               | 0.51  | 0.36  | 0.39  | 0.58  | -0.46 | 0.47  | 0.48  | 0.59  | 0.37  | 0.62  |
| 12. Self-Worth                  | 0.49  | 0.48  | 0.35  | 0.58  | -0.50 | 0.53  | 0.45  | 0.69  | 0.30  | 0.64  |
| 13. Control                     | 0.39  | 0.23  | 0.26  | 0.41  | -0.44 | 0.32  | 0.30  | 0.37  | 0.18  | 0.42  |
| 14. Meaning                     | 0.49  | 0.44  | 0.35  | 0.57  | -0.55 | 0.56  | 0.41  | 0.61  | 0.31  | 0.72  |
| 15. Optimism                    | 0.52  | 0.43  | 0.48  | 0.60  | -0.57 | 0.57  | 0.44  | 0.60  | 0.37  | 0.76  |
| 16. Life Satisfaction           | 0.47  | 0.47  | 0.41  | 0.54  | -0.61 | 0.54  | 0.37  | 0.64  | 0.28  | 0.82  |
| 17. Positive Feelings           | 0.53  | 0.48  | 0.48  | 0.61  | -0.66 | 0.58  | 0.42  | 0.59  | 0.31  | 0.73  |
| 18. Negative Feelings           | -0.52 | -0.43 | -0.45 | -0.60 | 0.67  | -0.56 | -0.36 | -0.54 | -0.27 | -0.64 |
| 19. Overall Thriving            | 0.73  | 0.47  | 0.50  | 0.67  | -0.75 | 0.60  | 0.43  | 0.58  | 0.33  | 0.70  |
| 20. Stress                      | -0.34 | -0.31 | -0.35 | -0.41 | 0.51  | -0.38 | -0.19 | -0.35 | -0.14 | -0.38 |
| 21. Depression                  | -0.51 | -0.39 | -0.40 | -0.57 | 0.65  | -0.51 | -0.35 | -0.50 | -0.23 | -0.60 |
| 22. Anxiety                     | -0.33 | -0.22 | -0.26 | -0.34 | 0.44  | -0.29 | -0.18 | -0.29 | -0.11 | -0.35 |
| 23. Relatedness Satisfaction    | 0.71  | 0.44  | 0.44  | 0.57  | -0.71 | 0.53  | 0.36  | 0.44  | 0.30  | 0.53  |
| 24. Relatedness Dissatisfaction | -0.50 | -0.34 | -0.36 | -0.51 | 0.75  | -0.44 | -0.26 | -0.38 | -0.19 | -0.45 |
| 25. Autonomy Satisfaction       | 0.50  | 0.37  | 0.44  | 0.59  | -0.51 | 0.48  | 0.48  | 0.62  | 0.30  | 0.60  |
| 26. Autonomy Dissatisfaction    | -0.36 | -0.24 | -0.33 | -0.45 | 0.48  | -0.35 | -0.27 | -0.36 | -0.17 | -0.41 |

|                                |       |       |       |       |       |       |       |       |       |       |
|--------------------------------|-------|-------|-------|-------|-------|-------|-------|-------|-------|-------|
| 27. Competency Satisfaction    | 0.36  | 0.40  | 0.34  | 0.47  | -0.38 | 0.40  | 0.45  | 0.66  | 0.31  | 0.61  |
| 28. Competency Dissatisfaction | -0.39 | -0.30 | -0.33 | -0.48 | 0.50  | -0.38 | -0.24 | -0.40 | -0.19 | -0.46 |
| 29. Relatedness Overall        | 0.68  | 0.44  | 0.45  | 0.60  | -0.82 | 0.55  | 0.35  | 0.46  | 0.28  | 0.55  |
| 30. Autonomy Overall           | 0.47  | 0.34  | 0.42  | 0.57  | -0.55 | 0.46  | 0.41  | 0.54  | 0.25  | 0.56  |
| 31. Competency Overall         | 0.45  | 0.42  | 0.40  | 0.57  | -0.54 | 0.47  | 0.41  | 0.62  | 0.29  | 0.63  |

|                              |       |       |       |       |       |       |       |       |       |       |
|------------------------------|-------|-------|-------|-------|-------|-------|-------|-------|-------|-------|
|                              | 11    | 12    | 13    | 14    | 15    | 16    | 17    | 18    | 19    | 20    |
| 1. Support                   | 0.45  | 0.44  | 0.35  | 0.47  | 0.46  | 0.45  | 0.48  | -0.48 | 0.70  | -0.36 |
| 2. Community                 | 0.33  | 0.49  | 0.17  | 0.39  | 0.37  | 0.41  | 0.41  | -0.34 | 0.39  | -0.26 |
| 3. Trust                     | 0.35  | 0.37  | 0.25  | 0.37  | 0.49  | 0.43  | 0.53  | -0.46 | 0.53  | -0.38 |
| 4. Respect                   | 0.54  | 0.54  | 0.43  | 0.54  | 0.55  | 0.53  | 0.60  | -0.53 | 0.62  | -0.43 |
| 5. Loneliness                | -0.44 | -0.45 | -0.43 | -0.57 | -0.53 | -0.59 | -0.63 | 0.65  | -0.73 | 0.49  |
| 6. Belonging                 | 0.46  | 0.53  | 0.31  | 0.55  | 0.58  | 0.54  | 0.60  | -0.56 | 0.63  | -0.45 |
| 7. Engagement                | 0.45  | 0.44  | 0.22  | 0.40  | 0.40  | 0.37  | 0.40  | -0.31 | 0.36  | -0.10 |
| 8. Skills                    | 0.59  | 0.68  | 0.37  | 0.57  | 0.56  | 0.62  | 0.59  | -0.50 | 0.56  | -0.30 |
| 9. Learning                  | 0.29  | 0.27  | 0.10  | 0.25  | 0.27  | 0.20  | 0.23  | -0.20 | 0.24  | -0.12 |
| 10. Accomplishment           | 0.61  | 0.67  | 0.37  | 0.70  | 0.74  | 0.82  | 0.69  | -0.62 | 0.66  | -0.44 |
| 11. Self-Efficacy            | ---   | 0.59  | 0.39  | 0.58  | 0.65  | 0.56  | 0.61  | -0.53 | 0.59  | -0.35 |
| 12. Self-Worth               | 0.60  | ---   | 0.28  | 0.69  | 0.63  | 0.61  | 0.60  | -0.52 | 0.57  | -0.31 |
| 13. Control                  | 0.45  | 0.31  | ---   | 0.37  | 0.39  | 0.37  | 0.41  | -0.48 | 0.48  | -0.36 |
| 14. Meaning                  | 0.61  | 0.71  | 0.40  | ---   | 0.68  | 0.69  | 0.66  | -0.62 | 0.66  | -0.42 |
| 15. Optimism                 | 0.68  | 0.62  | 0.45  | 0.70  | ---   | 0.73  | 0.77  | -0.69 | 0.73  | -0.50 |
| 16. Life Satisfaction        | 0.57  | 0.61  | 0.42  | 0.69  | 0.75  | ---   | 0.74  | -0.66 | 0.71  | -0.44 |
| 17. Positive Feelings        | 0.61  | 0.59  | 0.41  | 0.67  | 0.79  | 0.76  | ---   | -0.81 | 0.88  | -0.60 |
| 18. Negative Feelings        | -0.56 | -0.57 | -0.45 | -0.65 | -0.73 | -0.69 | -0.82 | ---   | -0.91 | 0.64  |
| 19. Overall Thriving         | 0.63  | 0.61  | 0.48  | 0.68  | 0.76  | 0.74  | 0.89  | -0.92 | ---   | -0.63 |
| 20. Stress                   | -0.36 | -0.35 | -0.34 | -0.38 | -0.46 | -0.45 | -0.58 | 0.66  | -0.61 | ---   |
| 21. Depression               | -0.57 | -0.56 | -0.45 | -0.62 | -0.68 | -0.65 | -0.74 | 0.83  | -0.80 | 0.74  |
| 22. Anxiety                  | -0.34 | -0.33 | -0.30 | -0.32 | -0.40 | -0.38 | -0.47 | 0.57  | -0.53 | 0.73  |
| 23. Relatedness Satisfaction | 0.49  | 0.52  | 0.38  | 0.54  | 0.55  | 0.57  | 0.62  | -0.56 | 0.70  | -0.44 |



|                                 |       |       |       |       |       |       |       |       |       |       |
|---------------------------------|-------|-------|-------|-------|-------|-------|-------|-------|-------|-------|
| 24. Relatedness Dissatisfaction | -0.40 | -0.40 | -0.43 | -0.43 | -0.50 | -0.53 | -0.58 | 0.62  | -0.64 | 0.60  |
| 25. Autonomy Satisfaction       | 0.57  | 0.53  | 0.51  | 0.57  | 0.58  | 0.60  | 0.62  | -0.59 | 0.65  | -0.46 |
| 26. Autonomy Dissatisfaction    | -0.38 | -0.29 | -0.55 | -0.37 | -0.44 | -0.48 | -0.52 | 0.54  | -0.56 | 0.58  |
| 27. Competency Satisfaction     | 0.58  | 0.63  | 0.32  | 0.54  | 0.56  | 0.53  | 0.56  | -0.50 | 0.53  | -0.30 |
| 28. Competency Dissatisfaction  | -0.48 | -0.42 | -0.40 | -0.46 | -0.47 | -0.47 | -0.53 | 0.60  | -0.59 | 0.61  |
| 29. Relatedness Overall         | 0.51  | 0.51  | 0.46  | 0.55  | 0.59  | 0.62  | 0.67  | -0.67 | 0.75  | -0.58 |
| 30. Autonomy Overall            | 0.52  | 0.45  | 0.60  | 0.52  | 0.57  | 0.60  | 0.63  | -0.64 | 0.67  | -0.59 |
| 31. Competency Overall          | 0.63  | 0.61  | 0.43  | 0.59  | 0.61  | 0.60  | 0.65  | -0.66 | 0.68  | -0.56 |

|                       | 21    | 22    | 23    | 24    | 25    | 26    | 27    | 28    | 29    | 30    | 31    |
|-----------------------|-------|-------|-------|-------|-------|-------|-------|-------|-------|-------|-------|
| 1. Support            | -0.51 | -0.31 | 0.68  | -0.49 | 0.47  | -0.32 | 0.33  | -0.38 | 0.67  | 0.45  | 0.43  |
| 2. Community          | -0.32 | -0.16 | 0.35  | -0.21 | 0.29  | -0.17 | 0.35  | -0.26 | 0.32  | 0.26  | 0.37  |
| 3. Trust              | -0.41 | -0.25 | 0.35  | -0.36 | 0.35  | -0.31 | 0.31  | -0.35 | 0.41  | 0.38  | 0.41  |
| 4. Respect            | -0.58 | -0.37 | 0.50  | -0.45 | 0.52  | -0.38 | 0.47  | -0.47 | 0.55  | 0.51  | 0.57  |
| 5. Loneliness         | 0.65  | 0.42  | -0.68 | 0.71  | -0.46 | 0.43  | -0.38 | 0.53  | -0.81 | -0.51 | -0.56 |
| 6. Belonging          | -0.56 | -0.34 | 0.47  | -0.45 | 0.44  | -0.34 | 0.42  | -0.44 | 0.53  | 0.44  | 0.52  |
| 7. Engagement         | -0.32 | -0.12 | 0.37  | -0.25 | 0.44  | -0.21 | 0.45  | -0.24 | 0.36  | 0.36  | 0.40  |
| 8. Skills             | -0.50 | -0.26 | 0.44  | -0.36 | 0.60  | -0.32 | 0.63  | -0.39 | 0.47  | 0.51  | 0.60  |
| 9. Learning           | -0.19 | -0.10 | 0.24  | -0.15 | 0.24  | -0.08 | 0.31  | -0.11 | 0.22  | 0.18  | 0.24  |
| 10. Accomplishment    | -0.63 | -0.38 | 0.50  | -0.46 | 0.56  | -0.37 | 0.58  | -0.46 | 0.56  | 0.52  | 0.62  |
| 11. Self-Efficacy     | -0.57 | -0.36 | 0.45  | -0.35 | 0.54  | -0.28 | 0.57  | -0.47 | 0.46  | 0.45  | 0.62  |
| 12. Self-Worth        | -0.54 | -0.27 | 0.47  | -0.34 | 0.47  | -0.21 | 0.55  | -0.37 | 0.47  | 0.38  | 0.55  |
| 13. Control           | -0.43 | -0.30 | 0.34  | -0.39 | 0.47  | -0.53 | 0.29  | -0.39 | 0.42  | 0.58  | 0.42  |
| 14. Meaning           | -0.65 | -0.36 | 0.51  | -0.47 | 0.52  | -0.35 | 0.52  | -0.47 | 0.57  | 0.50  | 0.60  |
| 15. Optimism          | -0.70 | -0.41 | 0.50  | -0.45 | 0.55  | -0.39 | 0.51  | -0.48 | 0.55  | 0.53  | 0.59  |
| 16. Life Satisfaction | -0.68 | -0.38 | 0.55  | -0.49 | 0.55  | -0.42 | 0.52  | -0.47 | 0.60  | 0.55  | 0.60  |
| 17. Positive Feelings | -0.78 | -0.48 | 0.54  | -0.55 | 0.58  | -0.45 | 0.53  | -0.56 | 0.63  | 0.59  | 0.66  |
| 18. Negative Feelings | 0.81  | 0.54  | -0.48 | 0.59  | -0.51 | 0.50  | -0.46 | 0.61  | -0.62 | -0.58 | -0.66 |
| 19. Overall Thriving  | -0.81 | -0.53 | 0.61  | -0.63 | 0.59  | -0.52 | 0.50  | -0.61 | 0.72  | 0.63  | 0.68  |
| 20. Stress            | 0.74  | 0.74  | -0.36 | 0.56  | -0.47 | 0.52  | -0.30 | 0.62  | -0.54 | -0.57 | -0.58 |

|                                 |       |       |       |       |       |       |       |       |       |       |       |
|---------------------------------|-------|-------|-------|-------|-------|-------|-------|-------|-------|-------|-------|
| 21. Depression                  | ---   | 0.67  | -0.53 | 0.60  | -0.56 | 0.48  | -0.52 | 0.65  | -0.66 | -0.59 | -0.72 |
| 22. Anxiety                     | 0.68  | ---   | -0.29 | 0.49  | -0.37 | 0.38  | -0.30 | 0.54  | -0.45 | -0.43 | -0.53 |
| 23. Relatedness Satisfaction    | -0.57 | -0.36 | ---   | -0.48 | 0.53  | -0.32 | 0.46  | -0.38 | 0.86  | 0.48  | 0.51  |
| 24. Relatedness Dissatisfaction | 0.62  | 0.45  | -0.58 | ---   | -0.49 | 0.64  | -0.25 | 0.66  | -0.86 | -0.66 | -0.57 |
| 25. Autonomy Satisfaction       | -0.59 | -0.39 | 0.61  | -0.50 | ---   | -0.52 | 0.53  | -0.47 | 0.59  | 0.85  | 0.61  |
| 26. Autonomy Dissatisfaction    | 0.54  | 0.43  | -0.43 | 0.61  | -0.59 | ---   | -0.17 | 0.60  | -0.56 | -0.89 | -0.49 |
| 27. Competency Satisfaction     | -0.49 | -0.28 | 0.47  | -0.34 | 0.56  | -0.23 | ---   | -0.35 | 0.41  | 0.39  | 0.78  |
| 28. Competency Dissatisfaction  | 0.64  | 0.53  | -0.43 | 0.61  | -0.49 | 0.60  | -0.39 | ---   | -0.60 | -0.62 | -0.86 |
| 29. Relatedness Overall         | -0.66 | -0.46 | 0.89  | -0.89 | 0.63  | -0.58 | 0.46  | -0.59 | ---   | 0.66  | 0.63  |
| 30. Autonomy Overall            | -0.63 | -0.46 | 0.57  | -0.63 | 0.87  | -0.91 | 0.42  | -0.62 | 0.67  | ---   | 0.62  |
| 31. Competency Overall          | -0.68 | -0.50 | 0.54  | -0.58 | 0.62  | -0.51 | 0.81  | -0.86 | 0.63  | 0.63  | ---   |

Supplementary Table S4.

*Gallery (1) vs Non-gallery (0) regression predicting well-being*

| <b>Variable</b>   | <b>Predictor</b>        | <b>Estimate</b> | <b>SE</b> | <b>p</b> | <b>f<sup>2</sup></b> |
|-------------------|-------------------------|-----------------|-----------|----------|----------------------|
| Support           | Pre                     | 0.79***         | 0.02      | < 0.001  | 1.79                 |
|                   | Gallery vs. Non-Gallery | 0.06            | 0.06      | 0.336    | 0.00                 |
| Community         | Pre                     | 0.78***         | 0.02      | < 0.001  | 1.52                 |
|                   | Gallery vs. Non-Gallery | 0.09            | 0.07      | 0.185    | 0.00                 |
| Trust             | Pre                     | 0.82***         | 0.02      | < 0.001  | 1.63                 |
|                   | Gallery vs. Non-Gallery | 0.05            | 0.07      | 0.512    | 0.00                 |
| Respect           | Pre                     | 0.79***         | 0.02      | < 0.001  | 1.62                 |
|                   | Gallery vs. Non-Gallery | 0.07            | 0.07      | 0.33     | 0.00                 |
| Loneliness        | Pre                     | 0.87***         | 0.02      | < 0.001  | 2.45                 |
|                   | Gallery vs. Non-Gallery | -0.09           | 0.06      | 0.134    | 0.00                 |
| Belonging         | Pre                     | 0.83***         | 0.02      | < 0.001  | 1.80                 |
|                   | Gallery vs. Non-Gallery | 0.05            | 0.07      | 0.443    | 0.00                 |
| Engagement        | Pre                     | 0.67***         | 0.03      | < 0.001  | 0.80                 |
|                   | Gallery vs. Non-Gallery | 0.16            | 0.08      | 0.051    | 0.01                 |
| Skills            | Pre                     | 0.76***         | 0.03      | < 0.001  | 1.33                 |
|                   | Gallery vs. Non-Gallery | -0.07           | 0.07      | 0.295    | 0.00                 |
| Learning          | Pre                     | 0.61***         | 0.03      | < 0.001  | 0.63                 |
|                   | Gallery vs. Non-Gallery | 0.00            | 0.08      | 0.966    | 0.00                 |
| Accomplishment    | Pre                     | 0.88***         | 0.02      | < 0.001  | 2.86                 |
|                   | Gallery vs. Non-Gallery | 0.01            | 0.06      | 0.859    | 0.00                 |
| Self-Efficacy     | Pre                     | 0.84***         | 0.02      | < 0.001  | 1.91                 |
|                   | Gallery vs. Non-Gallery | 0.00            | 0.07      | 0.992    | 0.00                 |
| Self-Worth        | Pre                     | 0.80***         | 0.02      | < 0.001  | 1.61                 |
|                   | Gallery vs. Non-Gallery | 0.12            | 0.07      | 0.091    | 0.00                 |
| Control           | Pre                     | 0.70***         | 0.03      | < 0.001  | 0.80                 |
|                   | Gallery vs. Non-Gallery | 0.15            | 0.09      | 0.07     | 0.00                 |
| Meaning           | Pre                     | 0.86***         | 0.02      | < 0.001  | 2.62                 |
|                   | Gallery vs. Non-Gallery | 0.11*           | 0.06      | 0.048    | 0.01                 |
| Optimism          | Pre                     | 0.84***         | 0.02      | < 0.001  | 2.82                 |
|                   | Gallery vs. Non-Gallery | 0.02            | 0.05      | 0.745    | 0.00                 |
| Life Satisfaction | Pre                     | 0.88***         | 0.02      | < 0.001  | 3.58                 |
|                   | Gallery vs. Non-Gallery | -0.08           | 0.05      | 0.101    | 0.00                 |
| Positive Feelings | Pre                     | 0.86***         | 0.02      | < 0.001  | 2.71                 |
|                   | Gallery vs. Non-Gallery | 0.03            | 0.06      | 0.542    | 0.00                 |
| Negative Feelings | Pre                     | 0.85***         | 0.02      | < 0.001  | 2.28                 |
|                   | Gallery vs. Non-Gallery | 0.01            | 0.06      | 0.933    | 0.00                 |
| Overall Thriving  | Pre                     | 0.87***         | 0.02      | < 0.001  | 2.78                 |
|                   | Gallery vs. Non-Gallery | 0.02            | 0.06      | 0.758    | 0.00                 |
| Stress            | Pre                     | 0.82***         | 0.02      | < 0.001  | 1.81                 |

|                             |                         |         |      |         |      |
|-----------------------------|-------------------------|---------|------|---------|------|
|                             | Gallery vs. Non-Gallery | 0.03    | 0.07 | 0.658   | 0.00 |
| Depression                  | Pre                     | 0.85*** | 0.02 | < 0.001 | 2.51 |
|                             | Gallery vs. Non-Gallery | -0.03   | 0.06 | 0.618   | 0.00 |
| Anxiety                     | Pre                     | 0.86*** | 0.02 | < 0.001 | 2.06 |
|                             | Gallery vs. Non-Gallery | 0.04    | 0.06 | 0.554   | 0.00 |
| Relatedness Satisfaction    | Pre                     | 0.78*** | 0.03 | < 0.001 | 1.26 |
|                             | Gallery vs. Non-Gallery | -0.11   | 0.07 | 0.14    | 0.00 |
| Relatedness Dissatisfaction | Pre                     | 0.71*** | 0.03 | < 0.001 | 0.94 |
|                             | Gallery vs. Non-Gallery | -0.05   | 0.08 | 0.558   | 0.00 |
| Autonomy Satisfaction       | Pre                     | 0.68*** | 0.03 | < 0.001 | 0.77 |
|                             | Gallery vs. Non-Gallery | 0.03    | 0.08 | 0.738   | 0.00 |
| Autonomy Dissatisfaction    | Pre                     | 0.72*** | 0.03 | < 0.001 | 0.92 |
|                             | Gallery vs. Non-Gallery | -0.05   | 0.08 | 0.54    | 0.00 |
| Competency Satisfaction     | Pre                     | 0.69*** | 0.03 | < 0.001 | 0.89 |
|                             | Gallery vs. Non-Gallery | -0.06   | 0.08 | 0.432   | 0.00 |
| Competency Dissatisfaction  | Pre                     | 0.67*** | 0.03 | < 0.001 | 0.89 |
|                             | Gallery vs. Non-Gallery | 0.08    | 0.08 | 0.326   | 0.00 |
| Relatedness Overall         | Pre                     | 0.82*** | 0.03 | < 0.001 | 1.51 |
|                             | Gallery vs. Non-Gallery | -0.05   | 0.07 | 0.521   | 0.00 |
| Autonomy Overall            | Pre                     | 0.79*** | 0.03 | < 0.001 | 1.25 |
|                             | Gallery vs. Non-Gallery | 0.03    | 0.08 | 0.723   | 0.00 |
| Competency Overall          | Pre                     | 0.77*** | 0.02 | < 0.001 | 1.47 |

*Note.* Estimates represent unstandardized regression weights in pre-intervention standard deviation units. Effect size is Cohen's  $f^2$  and can be interpreted as small = 0.02, medium = 0.15, large = 0.35.

Supplementary Table S5.

*Gallery (1) vs non-gallery (0) and interaction between condition and pre-test flourishing predicting post-test flourishing.*

| <b>Variable</b> | <b>Predictor</b> | <b>Estimate</b> | <b>SE</b> | <b>p</b> | <b>Effect Size</b> |
|-----------------|------------------|-----------------|-----------|----------|--------------------|
| Support         | Pre              | 0.78***         | 0.05      | < 0.001  | 0.33               |
|                 | Gallery          | 0.06            | 0.06      | 0.327    | 0.00               |
|                 | Interaction      | 0.02            | 0.06      | 0.792    | 0.00               |
| Community       | Pre              | 0.71***         | 0.06      | < 0.001  | 0.18               |
|                 | Gallery          | 0.10            | 0.07      | 0.164    | 0.00               |
|                 | Interaction      | 0.08            | 0.07      | 0.217    | 0.00               |
| Trust           | Pre              | 0.84***         | 0.06      | < 0.001  | 0.25               |
|                 | Gallery          | 0.04            | 0.07      | 0.555    | 0.00               |
|                 | Interaction      | -0.03           | 0.07      | 0.678    | 0.00               |
| Respect         | Pre              | 0.90***         | 0.06      | < 0.001  | 0.35               |
|                 | Gallery          | 0.06            | 0.07      | 0.416    | 0.00               |
|                 | Interaction      | -0.13*          | 0.06      | 0.046    | 0.00               |
| Loneliness      | Pre              | 0.98***         | 0.05      | < 0.001  | 0.49               |
|                 | Gallery          | -0.09           | 0.06      | 0.128    | 0.00               |
|                 | Interaction      | -0.13*          | 0.06      | 0.024    | 0.00               |
| Belonging       | Pre              | 0.81***         | 0.06      | < 0.001  | 0.25               |
|                 | Gallery          | 0.05            | 0.07      | 0.421    | 0.00               |
|                 | Interaction      | 0.03            | 0.07      | 0.675    | 0.00               |
| Engagement      | Pre              | 0.70***         | 0.07      | < 0.001  | 0.14               |
|                 | Gallery          | 0.16            | 0.08      | 0.055    | 0.01               |
|                 | Interaction      | -0.04           | 0.08      | 0.636    | 0.01               |
| Skills          | Pre              | 0.73***         | 0.07      | < 0.001  | 0.17               |
|                 | Gallery          | -0.07           | 0.07      | 0.318    | 0.00               |
|                 | Interaction      | 0.03            | 0.07      | 0.697    | 0.00               |
| Learning        | Pre              | 0.67***         | 0.07      | < 0.001  | 0.12               |
|                 | Gallery          | 0.00            | 0.08      | 0.993    | 0.00               |
|                 | Interaction      | -0.07           | 0.08      | 0.395    | 0.00               |
| Accomplishment  | Pre              | 0.96***         | 0.05      | < 0.001  | 0.46               |
|                 | Gallery          | 0.01            | 0.06      | 0.926    | 0.00               |
|                 | Interaction      | -0.09           | 0.06      | 0.11     | 0.00               |
| Self-Efficacy   | Pre              | 0.86***         | 0.06      | < 0.001  | 0.30               |
|                 | Gallery          | 0.00            | 0.07      | 0.997    | 0.00               |
|                 | Interaction      | -0.02           | 0.06      | 0.752    | 0.00               |
| Self-Worth      | Pre              | 0.94***         | 0.06      | < 0.001  | 0.33               |
|                 | Gallery          | 0.11            | 0.07      | 0.115    | 0.00               |
|                 | Interaction      | -0.16*          | 0.07      | 0.014    | 0.00               |
| Control         | Pre              | 0.80***         | 0.07      | < 0.001  | 0.17               |
|                 | Gallery          | 0.14            | 0.09      | 0.092    | 0.00               |

|                             |             |         |      |         |      |
|-----------------------------|-------------|---------|------|---------|------|
|                             | Interaction | -0.11   | 0.08 | 0.165   | 0.00 |
| Meaning                     | Pre         | 0.82*** | 0.05 | < 0.001 | 0.38 |
|                             | Gallery     | 0.12*   | 0.06 | 0.043   | 0.01 |
|                             | Interaction | 0.04    | 0.06 | 0.436   | 0.01 |
| Optimism                    | Pre         | 0.85*** | 0.05 | < 0.001 | 0.44 |
|                             | Gallery     | 0.02    | 0.05 | 0.767   | 0.00 |
|                             | Interaction | -0.02   | 0.05 | 0.754   | 0.00 |
| Life Satisfaction           | Pre         | 0.89*** | 0.05 | < 0.001 | 0.50 |
|                             | Gallery     | -0.08   | 0.05 | 0.099   | 0.00 |
|                             | Interaction | -0.01   | 0.05 | 0.843   | 0.00 |
| Positive Feelings           | Pre         | 0.88*** | 0.05 | < 0.001 | 0.44 |
|                             | Gallery     | 0.03    | 0.06 | 0.557   | 0.00 |
|                             | Interaction | -0.02   | 0.06 | 0.736   | 0.00 |
| Negative Feelings           | Pre         | 0.86*** | 0.05 | < 0.001 | 0.38 |
|                             | Gallery     | 0.00    | 0.06 | 0.934   | 0.00 |
|                             | Interaction | -0.02   | 0.06 | 0.714   | 0.00 |
| Overall Thriving            | Pre         | 0.92*** | 0.05 | < 0.001 | 0.49 |
|                             | Gallery     | 0.01    | 0.06 | 0.795   | 0.00 |
|                             | Interaction | -0.06   | 0.05 | 0.245   | 0.00 |
| Stress                      | Pre         | 0.83*** | 0.06 | < 0.001 | 0.31 |
|                             | Gallery     | 0.03    | 0.07 | 0.647   | 0.00 |
|                             | Interaction | -0.02   | 0.06 | 0.776   | 0.00 |
| Depression                  | Pre         | 0.97*** | 0.05 | < 0.001 | 0.51 |
|                             | Gallery     | -0.02   | 0.06 | 0.7     | 0.00 |
|                             | Interaction | -0.14*  | 0.06 | 0.014   | 0.00 |
| Anxiety                     | Pre         | 0.98*** | 0.06 | < 0.001 | 0.45 |
|                             | Gallery     | 0.05    | 0.06 | 0.467   | 0.00 |
|                             | Interaction | -0.14*  | 0.06 | 0.018   | 0.00 |
| Relatedness Satisfaction    | Pre         | 0.81*** | 0.07 | < 0.001 | 0.21 |
|                             | Gallery     | -0.11   | 0.08 | 0.13    | 0.00 |
|                             | Interaction | -0.04   | 0.07 | 0.629   | 0.00 |
| Relatedness Dissatisfaction | Pre         | 0.73*** | 0.07 | < 0.001 | 0.17 |
|                             | Gallery     | -0.04   | 0.08 | 0.573   | 0.00 |
|                             | Interaction | -0.03   | 0.07 | 0.732   | 0.00 |
| Autonomy Satisfaction       | Pre         | 0.62*** | 0.08 | < 0.001 | 0.10 |
|                             | Gallery     | 0.04    | 0.08 | 0.671   | 0.00 |
|                             | Interaction | 0.07    | 0.08 | 0.414   | 0.00 |
| Autonomy Dissatisfaction    | Pre         | 0.66*** | 0.07 | < 0.001 | 0.14 |
|                             | Gallery     | -0.06   | 0.08 | 0.461   | 0.00 |
|                             | Interaction | 0.08    | 0.07 | 0.308   | 0.00 |
| Competency Satisfaction     | Pre         | 0.65*** | 0.07 | < 0.001 | 0.13 |
|                             | Gallery     | -0.06   | 0.08 | 0.449   | 0.00 |
|                             | Interaction | 0.05    | 0.08 | 0.493   | 0.00 |

|                            |             |         |      |         |      |
|----------------------------|-------------|---------|------|---------|------|
| Competency Dissatisfaction | Pre         | 0.60*** | 0.07 | < 0.001 | 0.11 |
|                            | Gallery     | 0.08    | 0.08 | 0.314   | 0.00 |
|                            | Interaction | 0.09    | 0.08 | 0.253   | 0.00 |
| Relatedness Overall        | Pre         | 0.82*** | 0.06 | < 0.001 | 0.26 |
|                            | Gallery     | -0.05   | 0.07 | 0.521   | 0.00 |
|                            | Interaction | 0.00    | 0.07 | 0.974   | 0.00 |
| Autonomy Overall           | Pre         | 0.71*** | 0.06 | < 0.001 | 0.18 |
|                            | Gallery     | 0.04    | 0.08 | 0.598   | 0.00 |
|                            | Interaction | 0.09    | 0.07 | 0.192   | 0.00 |
| Competency Overall         | Pre         | 0.74*** | 0.06 | < 0.001 | 0.21 |
|                            | Gallery     | -0.08   | 0.07 | 0.222   | 0.00 |
|                            | Interaction | 0.04    | 0.07 | 0.538   | 0.00 |

*Note.* Estimates represent unstandardized regression weights in pre-intervention standard deviation units. Effect size is Cohen's  $f^2$  and can be interpreted as small = 0.02, medium = 0.15, large = 0.35.

Supplementary Table S6.

*Slow looking (1) vs. No slow looking (0) predicting well-being*

| <b>Variable</b>   | <b>Predictor</b> | <b>Estimate</b> | <b>SE</b> | <b>p</b> | <b>f<sup>2</sup></b> |
|-------------------|------------------|-----------------|-----------|----------|----------------------|
| Support           | Pre              | 0.80***         | 0.02      | < 0.001  | 1.79                 |
|                   | SL vs. No SL     | 0.03            | 0.05      | 0.528    | 0.00                 |
| Community         | Pre              | 0.79***         | 0.03      | < 0.001  | 1.62                 |
|                   | SL vs. No SL     | -0.05           | 0.05      | 0.335    | 0.00                 |
| Trust             | Pre              | 0.81***         | 0.03      | < 0.001  | 1.65                 |
|                   | SL vs. No SL     | 0.04            | 0.05      | 0.398    | 0.00                 |
| Respect           | Pre              | 0.77***         | 0.03      | < 0.001  | 1.60                 |
|                   | SL vs. No SL     | 0.00            | 0.05      | 0.941    | 0.00                 |
| Loneliness        | Pre              | 0.85***         | 0.02      | < 0.001  | 2.36                 |
|                   | SL vs. No SL     | 0.03            | 0.05      | 0.554    | 0.00                 |
| Belonging         | Pre              | 0.84***         | 0.03      | < 0.001  | 1.83                 |
|                   | SL vs. No SL     | 0.01            | 0.05      | 0.895    | 0.00                 |
| Engagement        | Pre              | 0.66***         | 0.03      | < 0.001  | 0.82                 |
|                   | SL vs. No SL     | 0.01            | 0.06      | 0.925    | 0.00                 |
| Skills            | Pre              | 0.76***         | 0.03      | < 0.001  | 1.41                 |
|                   | SL vs. No SL     | -0.08           | 0.05      | 0.122    | 0.00                 |
| Learning          | Pre              | 0.60***         | 0.03      | < 0.001  | 0.59                 |
|                   | SL vs. No SL     | -0.04           | 0.07      | 0.557    | 0.00                 |
| Accomplishment    | Pre              | 0.87***         | 0.02      | < 0.001  | 2.88                 |
|                   | SL vs. No SL     | 0.10*           | 0.04      | 0.022    | 0.01                 |
| Self-Efficacy     | Pre              | 0.84***         | 0.03      | < 0.001  | 1.94                 |
|                   | SL vs. No SL     | -0.02           | 0.05      | 0.637    | 0.00                 |
| Self-Worth        | Pre              | 0.77***         | 0.03      | < 0.001  | 1.50                 |
|                   | SL vs. No SL     | -0.07           | 0.05      | 0.162    | 0.00                 |
| Control           | Pre              | 0.69***         | 0.03      | < 0.001  | 0.78                 |
|                   | SL vs. No SL     | 0.05            | 0.06      | 0.442    | 0.00                 |
| Meaning           | Pre              | 0.87***         | 0.02      | < 0.001  | 2.78                 |
|                   | SL vs. No SL     | -0.06           | 0.04      | 0.183    | 0.00                 |
| Optimism          | Pre              | 0.84***         | 0.02      | < 0.001  | 2.80                 |
|                   | SL vs. No SL     | 0.01            | 0.04      | 0.884    | 0.00                 |
| Life Satisfaction | Pre              | 0.88***         | 0.02      | < 0.001  | 3.67                 |
|                   | SL vs. No SL     | 0.02            | 0.04      | 0.602    | 0.00                 |
| Positive Feelings | Pre              | 0.86***         | 0.02      | < 0.001  | 2.71                 |
|                   | SL vs. No SL     | 0.00            | 0.04      | 0.986    | 0.00                 |
| Negative Feelings | Pre              | 0.84***         | 0.02      | < 0.001  | 2.22                 |
|                   | SL vs. No SL     | 0.00            | 0.05      | 0.988    | 0.00                 |
| Overall Thriving  | Pre              | 0.86***         | 0.02      | < 0.001  | 2.74                 |
|                   | SL vs. No SL     | 0.02            | 0.04      | 0.708    | 0.00                 |
| Stress            | Pre              | 0.81***         | 0.03      | < 0.001  | 1.77                 |



|                             |              |         |      |         |      |
|-----------------------------|--------------|---------|------|---------|------|
|                             | SL vs. No SL | 0.03    | 0.05 | 0.550   | 0.00 |
| Depression                  | Pre          | 0.83*** | 0.02 | < 0.001 | 2.45 |
|                             | SL vs. No SL | 0.03    | 0.04 | 0.544   | 0.00 |
| Anxiety                     | Pre          | 0.83*** | 0.03 | < 0.001 | 1.78 |
|                             | SL vs. No SL | 0.00    | 0.05 | 0.944   | 0.00 |
| Relatedness Satisfaction    | Pre          | 0.77*** | 0.03 | < 0.001 | 1.23 |
|                             | SL vs. No SL | 0.10    | 0.06 | 0.100   | 0.00 |
| Relatedness Dissatisfaction | Pre          | 0.70*** | 0.03 | < 0.001 | 0.91 |
|                             | SL vs. No SL | -0.03   | 0.06 | 0.625   | 0.00 |
| Autonomy Satisfaction       | Pre          | 0.69*** | 0.03 | < 0.001 | 0.81 |
|                             | SL vs. No SL | -0.01   | 0.06 | 0.842   | 0.00 |
| Autonomy Dissatisfaction    | Pre          | 0.73*** | 0.03 | < 0.001 | 0.98 |
|                             | SL vs. No SL | 0.05    | 0.06 | 0.446   | 0.00 |
| Competency Satisfaction     | Pre          | 0.70*** | 0.03 | < 0.001 | 0.90 |
|                             | SL vs. No SL | 0.02    | 0.06 | 0.782   | 0.00 |
| Competency Dissatisfaction  | Pre          | 0.68*** | 0.03 | < 0.001 | 0.95 |
|                             | SL vs. No SL | -0.04   | 0.06 | 0.544   | 0.00 |
| Relatedness Overall         | Pre          | 0.83*** | 0.03 | < 0.001 | 1.50 |
|                             | SL vs. No SL | 0.09    | 0.06 | 0.120   | 0.00 |
| Autonomy Overall            | Pre          | 0.80*** | 0.03 | < 0.001 | 1.33 |
|                             | SL vs. No SL | -0.03   | 0.06 | 0.625   | 0.00 |
| Competency Overall          | Pre          | 0.78*** | 0.03 | < 0.001 | 1.51 |
|                             | SL vs. No SL | 0.04    | 0.05 | 0.427   | 0.00 |

*Note.* Estimates represent unstandardized regression weights in pre-intervention standard deviation units. Effect size is Cohen's  $f^2$  and can be interpreted as small = 0.02, medium = 0.15, large = 0.35.

Supplementary Table S7.

*Slow Looking (1) vs. no slow looking (0) and the condition and pre-test flourishing interaction predicting post-test flourishing.*

| Variable       | Predictor   | Estimate | SE   | p       | Effect Size |
|----------------|-------------|----------|------|---------|-------------|
| Support        | Pre         | 0.80***  | 0.03 | < 0.001 | 1.25        |
|                | SL          | 0.04     | 0.05 | 0.39    | 0.00        |
|                | Interaction | -0.02    | 0.05 | 0.628   | 0.00        |
| Community      | Pre         | 0.77***  | 0.03 | < 0.001 | 1.00        |
|                | SL          | -0.03    | 0.05 | 0.61    | 0.00        |
|                | Interaction | 0.04     | 0.05 | 0.449   | 0.00        |
| Trust          | Pre         | 0.83***  | 0.03 | < 0.001 | 1.07        |
|                | SL          | 0.05     | 0.05 | 0.322   | 0.00        |
|                | Interaction | -0.04    | 0.05 | 0.38    | 0.00        |
| Respect        | Pre         | 0.81***  | 0.03 | < 0.001 | 1.16        |
|                | SL          | 0.02     | 0.05 | 0.71    | 0.00        |
|                | Interaction | -0.06    | 0.05 | 0.231   | 0.00        |
| Loneliness     | Pre         | 0.86***  | 0.03 | < 0.001 | 1.59        |
|                | SL          | 0.00     | 0.04 | 0.957   | 0.00        |
|                | Interaction | 0.02     | 0.04 | 0.704   | 0.00        |
| Belonging      | Pre         | 0.83***  | 0.03 | < 0.001 | 1.19        |
|                | SL          | 0.02     | 0.05 | 0.728   | 0.00        |
|                | Interaction | -0.01    | 0.05 | 0.912   | 0.00        |
| Engagement     | Pre         | 0.69***  | 0.04 | < 0.001 | 0.53        |
|                | SL          | 0.04     | 0.06 | 0.505   | 0.00        |
|                | Interaction | -0.04    | 0.06 | 0.554   | 0.00        |
| Skills         | Pre         | 0.75***  | 0.03 | < 0.001 | 0.85        |
|                | SL          | -0.09    | 0.05 | 0.078   | 0.00        |
|                | Interaction | 0.01     | 0.05 | 0.829   | 0.00        |
| Learning       | Pre         | 0.61***  | 0.04 | < 0.001 | 0.41        |
|                | SL          | -0.03    | 0.06 | 0.581   | 0.00        |
|                | Interaction | 0.01     | 0.06 | 0.812   | 0.00        |
| Accomplishment | Pre         | 0.88***  | 0.02 | < 0.001 | 1.85        |
|                | SL          | 0.09*    | 0.04 | 0.024   | 0.01        |
|                | Interaction | 0.01     | 0.04 | 0.782   | 0.01        |
| Self-Efficacy  | Pre         | 0.83***  | 0.03 | < 0.001 | 1.19        |
|                | SL          | -0.02    | 0.05 | 0.669   | 0.00        |
|                | Interaction | 0.04     | 0.05 | 0.377   | 0.00        |
| Self-Worth     | Pre         | 0.78***  | 0.03 | < 0.001 | 1.05        |
|                | SL          | -0.04    | 0.05 | 0.419   | 0.00        |
|                | Interaction | 0.05     | 0.05 | 0.349   | 0.00        |
| Control        | Pre         | 0.70***  | 0.04 | < 0.001 | 0.55        |
|                | SL          | 0.08     | 0.06 | 0.212   | 0.00        |

|                             |             |         |      |         |      |
|-----------------------------|-------------|---------|------|---------|------|
|                             | Interaction | 0.03    | 0.07 | 0.64    | 0.00 |
| Meaning                     | Pre         | 0.86*** | 0.02 | < 0.001 | 1.76 |
|                             | SL          | -0.03   | 0.04 | 0.517   | 0.00 |
|                             | Interaction | 0.01    | 0.04 | 0.87    | 0.00 |
| Optimism                    | Pre         | 0.83*** | 0.02 | < 0.001 | 1.74 |
|                             | SL          | 0.01    | 0.04 | 0.812   | 0.00 |
|                             | Interaction | 0.04    | 0.04 | 0.326   | 0.00 |
| Life Satisfaction           | Pre         | 0.89*** | 0.02 | < 0.001 | 2.25 |
|                             | SL          | 0.00    | 0.04 | 0.998   | 0.00 |
|                             | Interaction | -0.01   | 0.04 | 0.812   | 0.00 |
| Positive Feelings           | Pre         | 0.85*** | 0.03 | < 0.001 | 1.65 |
|                             | SL          | 0.01    | 0.04 | 0.81    | 0.00 |
|                             | Interaction | 0.04    | 0.04 | 0.298   | 0.00 |
| Negative Feelings           | Pre         | 0.81*** | 0.03 | < 0.001 | 1.33 |
|                             | SL          | 0.00    | 0.04 | 0.956   | 0.00 |
|                             | Interaction | 0.11*   | 0.04 | 0.016   | 0.00 |
| Overall Thriving            | Pre         | 0.85*** | 0.02 | < 0.001 | 1.73 |
|                             | SL          | 0.02    | 0.04 | 0.601   | 0.00 |
|                             | Interaction | 0.07    | 0.04 | 0.109   | 0.00 |
| Stress                      | Pre         | 0.81*** | 0.03 | < 0.001 | 1.21 |
|                             | SL          | 0.03    | 0.05 | 0.488   | 0.00 |
|                             | Interaction | 0.03    | 0.05 | 0.564   | 0.00 |
| Depression                  | Pre         | 0.85*** | 0.03 | < 0.001 | 1.58 |
|                             | SL          | 0.02    | 0.04 | 0.714   | 0.00 |
|                             | Interaction | 0.00    | 0.04 | 0.938   | 0.00 |
| Anxiety                     | Pre         | 0.86*** | 0.03 | < 0.001 | 1.37 |
|                             | SL          | 0.01    | 0.05 | 0.809   | 0.00 |
|                             | Interaction | -0.01   | 0.05 | 0.861   | 0.00 |
| Relatedness Satisfaction    | Pre         | 0.78*** | 0.03 | < 0.001 | 0.80 |
|                             | SL          | 0.06    | 0.06 | 0.252   | 0.00 |
|                             | Interaction | 0.00    | 0.06 | 1       | 0.00 |
| Relatedness Dissatisfaction | Pre         | 0.71*** | 0.03 | < 0.001 | 0.63 |
|                             | SL          | -0.04   | 0.06 | 0.518   | 0.00 |
|                             | Interaction | 0.00    | 0.06 | 0.967   | 0.00 |
| Autonomy Satisfaction       | Pre         | 0.66*** | 0.04 | < 0.001 | 0.48 |
|                             | SL          | -0.01   | 0.06 | 0.929   | 0.00 |
|                             | Interaction | 0.06    | 0.06 | 0.349   | 0.00 |
| Autonomy Dissatisfaction    | Pre         | 0.68*** | 0.03 | < 0.001 | 0.58 |
|                             | SL          | 0.03    | 0.06 | 0.597   | 0.00 |
|                             | Interaction | 0.11    | 0.06 | 0.063   | 0.00 |
| Competency Satisfaction     | Pre         | 0.66*** | 0.03 | < 0.001 | 0.54 |
|                             | SL          | 0.00    | 0.06 | 0.962   | 0.00 |
|                             | Interaction | 0.10    | 0.06 | 0.108   | 0.00 |

|                            |             |         |      |         |      |
|----------------------------|-------------|---------|------|---------|------|
| Competency Dissatisfaction | Pre         | 0.66*** | 0.03 | < 0.001 | 0.60 |
|                            | SL          | -0.02   | 0.06 | 0.778   | 0.00 |
|                            | Interaction | 0.04    | 0.06 | 0.461   | 0.00 |
| Relatedness Overall        | Pre         | 0.83*** | 0.03 | < 0.001 | 1.00 |
|                            | SL          | 0.07    | 0.05 | 0.208   | 0.00 |
|                            | Interaction | -0.02   | 0.05 | 0.705   | 0.00 |
| Autonomy Overall           | Pre         | 0.76*** | 0.03 | < 0.001 | 0.78 |
|                            | SL          | -0.02   | 0.06 | 0.721   | 0.00 |
|                            | Interaction | 0.08    | 0.06 | 0.166   | 0.00 |
| Competency Overall         | Pre         | 0.76*** | 0.03 | < 0.001 | 0.94 |
|                            | SL          | 0.02    | 0.05 | 0.685   | 0.00 |
|                            | Interaction | 0.06    | 0.05 | 0.255   | 0.00 |

*Note.* Estimates represent unstandardized regression weights in pre-intervention standard deviation units. Effect size is Cohen's  $f^2$  and can be interpreted as small = 0.02, medium = 0.15, large = 0.35.

Supplementary Table S8.

*Immersive mindset framing (1) vs. No framing (0) predicting well-being*

| <b>Variable</b>   | <b>Predictor</b>       | <b>Estimate</b> | <b>SE</b> | <b>p</b> | <b>f<sup>2</sup></b> |
|-------------------|------------------------|-----------------|-----------|----------|----------------------|
| Support           | Pre                    | 0.79***         | 0.02      | < 0.001  | 1.79                 |
|                   | Framing vs. No Framing | -0.05           | 0.05      | 0.383    | 0.00                 |
| Community         | Pre                    | 0.79***         | 0.03      | < 0.001  | 1.62                 |
|                   | Framing vs. No Framing | 0.02            | 0.06      | 0.695    | 0.00                 |
| Trust             | Pre                    | 0.81***         | 0.03      | < 0.001  | 1.65                 |
|                   | Framing vs. No Framing | 0.04            | 0.06      | 0.55     | 0.00                 |
| Respect           | Pre                    | 0.77***         | 0.03      | < 0.001  | 1.59                 |
|                   | Framing vs. No Framing | -0.06           | 0.06      | 0.266    | 0.00                 |
| Loneliness        | Pre                    | 0.85***         | 0.02      | < 0.001  | 2.37                 |
|                   | Framing vs. No Framing | 0.03            | 0.05      | 0.593    | 0.00                 |
| Belonging         | Pre                    | 0.84***         | 0.03      | < 0.001  | 1.85                 |
|                   | Framing vs. No Framing | 0.13*           | 0.06      | 0.026    | 0.01                 |
| Engagement        | Pre                    | 0.66***         | 0.03      | < 0.001  | 0.82                 |
|                   | Framing vs. No Framing | -0.05           | 0.07      | 0.472    | 0.00                 |
| Skills            | Pre                    | 0.76***         | 0.03      | < 0.001  | 1.42                 |
|                   | Framing vs. No Framing | 0.12*           | 0.06      | 0.047    | 0.01                 |
| Learning          | Pre                    | 0.60***         | 0.03      | < 0.001  | 0.59                 |
|                   | Framing vs. No Framing | -0.05           | 0.07      | 0.454    | 0.00                 |
| Accomplishment    | Pre                    | 0.87***         | 0.02      | < 0.001  | 2.85                 |
|                   | Framing vs. No Framing | 0.04            | 0.05      | 0.468    | 0.00                 |
| Self-Efficacy     | Pre                    | 0.84***         | 0.02      | < 0.001  | 1.94                 |
|                   | Framing vs. No Framing | -0.06           | 0.06      | 0.327    | 0.00                 |
| Self-Worth        | Pre                    | 0.77***         | 0.03      | < 0.001  | 1.50                 |
|                   | Framing vs. No Framing | -0.01           | 0.06      | 0.915    | 0.00                 |
| Control           | Pre                    | 0.68***         | 0.03      | < 0.001  | 0.77                 |
|                   | Framing vs. No Framing | -0.02           | 0.07      | 0.818    | 0.00                 |
| Meaning           | Pre                    | 0.87***         | 0.02      | < 0.001  | 2.78                 |
|                   | Framing vs. No Framing | 0.06            | 0.05      | 0.198    | 0.00                 |
| Optimism          | Pre                    | 0.84***         | 0.02      | < 0.001  | 2.80                 |
|                   | Framing vs. No Framing | 0.04            | 0.05      | 0.434    | 0.00                 |
| Life Satisfaction | Pre                    | 0.88***         | 0.02      | < 0.001  | 3.70                 |
|                   | Framing vs. No Framing | 0.08            | 0.04      | 0.063    | 0.01                 |
| Positive Feelings | Pre                    | 0.86***         | 0.02      | < 0.001  | 2.74                 |
|                   | Framing vs. No Framing | 0.06            | 0.05      | 0.199    | 0.00                 |
| Negative Feelings | Pre                    | 0.84***         | 0.02      | < 0.001  | 2.23                 |
|                   | Framing vs. No Framing | -0.06           | 0.05      | 0.284    | 0.00                 |
| Overall Thriving  | Pre                    | 0.86***         | 0.02      | < 0.001  | 2.76                 |
|                   | Framing vs. No Framing | 0.06            | 0.05      | 0.223    | 0.00                 |
| Stress            | Pre                    | 0.81***         | 0.03      | < 0.001  | 1.77                 |

|                             |                        |         |      |         |      |
|-----------------------------|------------------------|---------|------|---------|------|
|                             | Framing vs. No Framing | 0.05    | 0.06 | 0.375   | 0.00 |
| Depression                  | Pre                    | 0.83*** | 0.02 | < 0.001 | 2.46 |
|                             | Framing vs. No Framing | -0.03   | 0.05 | 0.525   | 0.00 |
| Anxiety                     | Pre                    | 0.83*** | 0.03 | < 0.001 | 1.77 |
|                             | Framing vs. No Framing | 0.00    | 0.06 | 0.947   | 0.00 |
| Relatedness Satisfaction    | Pre                    | 0.77*** | 0.03 | < 0.001 | 1.22 |
|                             | Framing vs. No Framing | -0.01   | 0.07 | 0.901   | 0.00 |
| Relatedness Dissatisfaction | Pre                    | 0.70*** | 0.03 | < 0.001 | 0.91 |
|                             | Framing vs. No Framing | 0.00    | 0.07 | 0.998   | 0.00 |
| Autonomy Satisfaction       | Pre                    | 0.69*** | 0.03 | < 0.001 | 0.81 |
|                             | Framing vs. No Framing | -0.07   | 0.07 | 0.31    | 0.00 |
| Autonomy Dissatisfaction    | Pre                    | 0.73*** | 0.03 | < 0.001 | 0.99 |
|                             | Framing vs. No Framing | 0.15*   | 0.07 | 0.025   | 0.01 |
| Competency Satisfaction     | Pre                    | 0.70*** | 0.03 | < 0.001 | 0.90 |
|                             | Framing vs. No Framing | -0.03   | 0.07 | 0.712   | 0.00 |
| Competency Dissatisfaction  | Pre                    | 0.68*** | 0.03 | < 0.001 | 0.95 |
|                             | Framing vs. No Framing | 0.01    | 0.07 | 0.858   | 0.00 |
| Relatedness Overall         | Pre                    | 0.82*** | 0.03 | < 0.001 | 1.49 |
|                             | Framing vs. No Framing | 0.00    | 0.06 | 0.994   | 0.00 |
| Autonomy Overall            | Pre                    | 0.80*** | 0.03 | < 0.001 | 1.34 |
|                             | Framing vs. No Framing | -0.13*  | 0.06 | 0.046   | 0.01 |
| Competency Overall          | Pre                    | 0.78*** | 0.03 | < 0.001 | 1.50 |
|                             | Framing vs. No Framing | -0.01   | 0.06 | 0.802   | 0.00 |

*Note.* Estimates represent unstandardized regression weights in pre-intervention standard deviation units. Effect size is Cohen's  $f^2$  and can be interpreted as small = 0.02, medium = 0.15, large = 0.35.

Supplementary Table S9.

*Immersive mindset framing (1) vs no framing (0) and interaction between condition and pre-test flourishing predicting post-test flourishing.*

| <b>Variable</b> | <b>Predictor</b> | <b>Estimate</b> | <b>SE</b> | <b>p</b> | <b>Effect Size</b> |
|-----------------|------------------|-----------------|-----------|----------|--------------------|
| Support         | Pre              | 0.80***         | 0.05      | < 0.001  | 0.43               |
|                 | Framing          | -0.05           | 0.05      | 0.392    | 0.00               |
|                 | Interaction      | -0.01           | 0.06      | 0.867    | 0.00               |
| Community       | Pre              | 0.79***         | 0.05      | < 0.001  | 0.42               |
|                 | Framing          | 0.02            | 0.06      | 0.696    | 0.00               |
|                 | Interaction      | 0.00            | 0.06      | 0.989    | 0.00               |
| Trust           | Pre              | 0.81***         | 0.05      | < 0.001  | 0.48               |
|                 | Framing          | 0.04            | 0.06      | 0.552    | 0.00               |
|                 | Interaction      | 0.01            | 0.06      | 0.894    | 0.00               |
| Respect         | Pre              | 0.78***         | 0.05      | < 0.001  | 0.43               |
|                 | Framing          | -0.06           | 0.06      | 0.273    | 0.00               |
|                 | Interaction      | -0.01           | 0.06      | 0.857    | 0.00               |
| Loneliness      | Pre              | 0.76***         | 0.04      | < 0.001  | 0.54               |
|                 | Framing          | 0.02            | 0.05      | 0.63     | 0.00               |
|                 | Interaction      | 0.12*           | 0.05      | 0.018    | 0.00               |
| Belonging       | Pre              | 0.92***         | 0.05      | < 0.001  | 0.54               |
|                 | Framing          | 0.13*           | 0.06      | 0.023    | 0.01               |
|                 | Interaction      | -0.11           | 0.06      | 0.055    | 0.01               |
| Engagement      | Pre              | 0.65***         | 0.06      | < 0.001  | 0.23               |
|                 | Framing          | -0.05           | 0.07      | 0.477    | 0.00               |
|                 | Interaction      | 0.03            | 0.07      | 0.693    | 0.00               |
| Skills          | Pre              | 0.73***         | 0.05      | < 0.001  | 0.36               |
|                 | Framing          | 0.12*           | 0.06      | 0.049    | 0.01               |
|                 | Interaction      | 0.04            | 0.06      | 0.49     | 0.01               |
| Learning        | Pre              | 0.50***         | 0.06      | < 0.001  | 0.12               |
|                 | Framing          | -0.06           | 0.07      | 0.429    | 0.00               |
|                 | Interaction      | 0.14*           | 0.07      | 0.04     | 0.00               |
| Accomplishment  | Pre              | 0.91***         | 0.04      | < 0.001  | 0.73               |
|                 | Framing          | 0.04            | 0.05      | 0.456    | 0.00               |
|                 | Interaction      | -0.06           | 0.05      | 0.27     | 0.00               |
| Self-Efficacy   | Pre              | 0.91***         | 0.05      | < 0.001  | 0.64               |
|                 | Framing          | -0.05           | 0.06      | 0.357    | 0.00               |
|                 | Interaction      | -0.10           | 0.06      | 0.083    | 0.00               |
| Self-Worth      | Pre              | 0.72***         | 0.05      | < 0.001  | 0.34               |
|                 | Framing          | 0.00            | 0.06      | 0.94     | 0.00               |
|                 | Interaction      | 0.08            | 0.06      | 0.19     | 0.00               |
| Control         | Pre              | 0.77***         | 0.06      | < 0.001  | 0.25               |
|                 | Framing          | 0.00            | 0.07      | 0.962    | 0.00               |

|                             |             |         |      |         |      |
|-----------------------------|-------------|---------|------|---------|------|
|                             | Interaction | -0.12   | 0.07 | 0.103   | 0.00 |
| Meaning                     | Pre         | 0.85*** | 0.04 | < 0.001 | 0.75 |
|                             | Framing     | 0.06    | 0.05 | 0.202   | 0.00 |
|                             | Interaction | 0.02    | 0.05 | 0.671   | 0.00 |
| Optimism                    | Pre         | 0.87*** | 0.04 | < 0.001 | 0.83 |
|                             | Framing     | 0.04    | 0.05 | 0.406   | 0.00 |
|                             | Interaction | -0.04   | 0.05 | 0.357   | 0.00 |
| Life Satisfaction           | Pre         | 0.90*** | 0.04 | < 0.001 | 0.96 |
|                             | Framing     | 0.08    | 0.04 | 0.062   | 0.01 |
|                             | Interaction | -0.02   | 0.04 | 0.582   | 0.01 |
| Positive Feelings           | Pre         | 0.88*** | 0.04 | < 0.001 | 0.75 |
|                             | Framing     | 0.06    | 0.05 | 0.195   | 0.00 |
|                             | Interaction | -0.02   | 0.05 | 0.701   | 0.00 |
| Negative Feelings           | Pre         | 0.81*** | 0.05 | < 0.001 | 0.52 |
|                             | Framing     | -0.05   | 0.05 | 0.304   | 0.00 |
|                             | Interaction | 0.04    | 0.05 | 0.471   | 0.00 |
| Overall Thriving            | Pre         | 0.87*** | 0.04 | < 0.001 | 0.69 |
|                             | Framing     | 0.06    | 0.05 | 0.217   | 0.00 |
|                             | Interaction | -0.02   | 0.05 | 0.738   | 0.00 |
| Stress                      | Pre         | 0.77*** | 0.05 | < 0.001 | 0.36 |
|                             | Framing     | 0.05    | 0.06 | 0.346   | 0.00 |
|                             | Interaction | 0.05    | 0.06 | 0.4     | 0.00 |
| Depression                  | Pre         | 0.77*** | 0.04 | < 0.001 | 0.53 |
|                             | Framing     | -0.03   | 0.05 | 0.594   | 0.00 |
|                             | Interaction | 0.08    | 0.05 | 0.106   | 0.00 |
| Anxiety                     | Pre         | 0.78*** | 0.06 | < 0.001 | 0.29 |
|                             | Framing     | 0.01    | 0.06 | 0.884   | 0.00 |
|                             | Interaction | 0.07    | 0.07 | 0.274   | 0.00 |
| Relatedness Satisfaction    | Pre         | 0.78*** | 0.06 | < 0.001 | 0.33 |
|                             | Framing     | -0.01   | 0.07 | 0.902   | 0.00 |
|                             | Interaction | -0.01   | 0.07 | 0.865   | 0.00 |
| Relatedness Dissatisfaction | Pre         | 0.73*** | 0.06 | < 0.001 | 0.24 |
|                             | Framing     | 0.00    | 0.07 | 0.978   | 0.00 |
|                             | Interaction | -0.04   | 0.07 | 0.552   | 0.00 |
| Autonomy Satisfaction       | Pre         | 0.64*** | 0.06 | < 0.001 | 0.19 |
|                             | Framing     | -0.08   | 0.07 | 0.288   | 0.00 |
|                             | Interaction | 0.07    | 0.07 | 0.349   | 0.00 |
| Autonomy Dissatisfaction    | Pre         | 0.72*** | 0.06 | < 0.001 | 0.22 |
|                             | Framing     | 0.15*   | 0.07 | 0.025   | 0.01 |
|                             | Interaction | 0.02    | 0.07 | 0.803   | 0.01 |
| Competency Satisfaction     | Pre         | 0.74*** | 0.06 | < 0.001 | 0.28 |
|                             | Framing     | -0.02   | 0.07 | 0.723   | 0.00 |
|                             | Interaction | -0.05   | 0.07 | 0.467   | 0.00 |



|                            |             |         |      |         |      |
|----------------------------|-------------|---------|------|---------|------|
| Competency Dissatisfaction | Pre         | 0.63*** | 0.06 | < 0.001 | 0.21 |
|                            | Framing     | 0.01    | 0.07 | 0.826   | 0.00 |
|                            | Interaction | 0.07    | 0.07 | 0.301   | 0.00 |
| Relatedness Overall        | Pre         | 0.83*** | 0.06 | < 0.001 | 0.38 |
|                            | Framing     | 0.00    | 0.06 | 0.998   | 0.00 |
|                            | Interaction | -0.01   | 0.06 | 0.897   | 0.00 |
| Autonomy Overall           | Pre         | 0.81*** | 0.06 | < 0.001 | 0.31 |
|                            | Framing     | -0.13*  | 0.06 | 0.046   | 0.01 |
|                            | Interaction | 0.00    | 0.07 | 0.972   | 0.01 |
| Competency Overall         | Pre         | 0.75*** | 0.05 | < 0.001 | 0.39 |
|                            | Framing     | -0.02   | 0.06 | 0.786   | 0.00 |
|                            | Interaction | 0.04    | 0.06 | 0.531   | 0.00 |

*Note.* Estimates represent unstandardized regression weights in pre-intervention standard deviation units. Effect size is Cohen's  $f^2$  and can be interpreted as small = 0.02, medium = 0.15, large = 0.35.

Supplementary Table S10.

*Slow looking, Immersive Mindset Framing, and Interaction predicting well-being*

| <b>Variable</b> | <b>Predictor</b>       | <b>Estimate</b> | <b>SE</b> | <b>p</b> | <b>f<sup>2</sup></b> |
|-----------------|------------------------|-----------------|-----------|----------|----------------------|
| Support         | Pre                    | 0.80***         | 0.02      | < 0.001  | 1.79                 |
|                 | SL vs. No SL           | -0.04           | 0.10      | 0.679    | 0.00                 |
|                 | Framing vs. No Framing | -0.09           | 0.07      | 0.229    | 0.00                 |
|                 | Interaction            | 0.09            | 0.11      | 0.397    | 0.00                 |
| Community       | Pre                    | 0.79***         | 0.03      | < 0.001  | 1.62                 |
|                 | SL vs. No SL           | -0.04           | 0.10      | 0.730    | 0.00                 |
|                 | Framing vs. No Framing | 0.03            | 0.08      | 0.692    | 0.00                 |
|                 | Interaction            | -0.02           | 0.12      | 0.866    | 0.00                 |
| Trust           | Pre                    | 0.81***         | 0.03      | < 0.001  | 1.65                 |
|                 | SL vs. No SL           | 0.15            | 0.10      | 0.162    | 0.00                 |
|                 | Framing vs. No Framing | 0.09            | 0.08      | 0.236    | 0.00                 |
|                 | Interaction            | -0.14           | 0.12      | 0.263    | 0.00                 |
| Respect         | Pre                    | 0.77***         | 0.03      | < 0.001  | 1.59                 |
|                 | SL vs. No SL           | 0.00            | 0.10      | 0.982    | 0.00                 |
|                 | Framing vs. No Framing | -0.06           | 0.07      | 0.391    | 0.00                 |
|                 | Interaction            | 0.00            | 0.12      | 0.995    | 0.00                 |
| Loneliness      | Pre                    | 0.85***         | 0.02      | < 0.001  | 2.36                 |
|                 | SL vs. No SL           | 0.01            | 0.09      | 0.884    | 0.00                 |
|                 | Framing vs. No Framing | 0.02            | 0.07      | 0.766    | 0.00                 |
|                 | Interaction            | 0.02            | 0.11      | 0.851    | 0.00                 |
| Belonging       | Pre                    | 0.84***         | 0.03      | < 0.001  | 1.85                 |
|                 | SL vs. No SL           | 0.11            | 0.10      | 0.260    | 0.00                 |
|                 | Framing vs. No Framing | 0.19*           | 0.08      | 0.013    | 0.01                 |
|                 | Interaction            | -0.14           | 0.12      | 0.226    | 0.00                 |
| Engagement      | Pre                    | 0.66***         | 0.03      | < 0.001  | 0.82                 |
|                 | SL vs. No SL           | 0.09            | 0.12      | 0.458    | 0.00                 |
|                 | Framing vs. No Framing | 0.00            | 0.09      | 0.976    | 0.00                 |
|                 | Interaction            | -0.11           | 0.14      | 0.416    | 0.00                 |
| Skills          | Pre                    | 0.76***         | 0.03      | < 0.001  | 1.43                 |
|                 | SL vs. No SL           | -0.17           | 0.11      | 0.100    | 0.00                 |
|                 | Framing vs. No Framing | 0.07            | 0.08      | 0.386    | 0.00                 |
|                 | Interaction            | 0.12            | 0.12      | 0.313    | 0.00                 |
| Learning        | Pre                    | 0.60***         | 0.03      | < 0.001  | 0.59                 |
|                 | SL vs. No SL           | -0.13           | 0.13      | 0.326    | 0.00                 |
|                 | Framing vs. No Framing | -0.10           | 0.10      | 0.278    | 0.00                 |
|                 | Interaction            | 0.12            | 0.15      | 0.432    | 0.00                 |
| Accomplishment  | Pre                    | 0.87***         | 0.02      | < 0.001  | 2.89                 |
|                 | SL vs. No SL           | 0.17*           | 0.09      | 0.047    | 0.01                 |
|                 | Framing vs. No Framing | 0.08            | 0.06      | 0.232    | 0.00                 |

|                   |                        |         |      |         |      |
|-------------------|------------------------|---------|------|---------|------|
|                   | Interaction            | -0.09   | 0.10 | 0.344   | 0.00 |
| Self-Efficacy     | Pre                    | 0.84*** | 0.03 | < 0.001 | 1.94 |
|                   | SL vs. No SL           | -0.06   | 0.10 | 0.521   | 0.00 |
|                   | Framing vs. No Framing | -0.08   | 0.07 | 0.293   | 0.00 |
|                   | Interaction            | 0.05    | 0.12 | 0.648   | 0.00 |
| Self-Worth        | Pre                    | 0.77*** | 0.03 | < 0.001 | 1.50 |
|                   | SL vs. No SL           | -0.09   | 0.10 | 0.383   | 0.00 |
|                   | Framing vs. No Framing | -0.02   | 0.08 | 0.829   | 0.00 |
|                   | Interaction            | 0.02    | 0.12 | 0.855   | 0.00 |
| Control           | Pre                    | 0.69*** | 0.03 | < 0.001 | 0.78 |
|                   | SL vs. No SL           | 0.22    | 0.13 | 0.086   | 0.01 |
|                   | Framing vs. No Framing | 0.08    | 0.09 | 0.413   | 0.00 |
|                   | Interaction            | -0.23   | 0.15 | 0.123   | 0.00 |
| Meaning           | Pre                    | 0.87*** | 0.02 | < 0.001 | 2.78 |
|                   | SL vs. No SL           | -0.10   | 0.09 | 0.224   | 0.00 |
|                   | Framing vs. No Framing | 0.04    | 0.06 | 0.572   | 0.00 |
|                   | Interaction            | 0.06    | 0.10 | 0.524   | 0.00 |
| Optimism          | Pre                    | 0.84*** | 0.02 | < 0.001 | 2.81 |
|                   | SL vs. No SL           | -0.07   | 0.08 | 0.380   | 0.00 |
|                   | Framing vs. No Framing | -0.01   | 0.06 | 0.911   | 0.00 |
|                   | Interaction            | 0.11    | 0.10 | 0.264   | 0.00 |
| Life Satisfaction | Pre                    | 0.88*** | 0.02 | < 0.001 | 3.70 |
|                   | SL vs. No SL           | -0.03   | 0.08 | 0.661   | 0.00 |
|                   | Framing vs. No Framing | 0.05    | 0.06 | 0.370   | 0.00 |
|                   | Interaction            | 0.07    | 0.09 | 0.400   | 0.00 |
| Positive Feelings | Pre                    | 0.86*** | 0.02 | < 0.001 | 2.72 |
|                   | SL vs. No SL           | -0.03   | 0.09 | 0.707   | 0.00 |
|                   | Framing vs. No Framing | 0.04    | 0.06 | 0.489   | 0.00 |
|                   | Interaction            | 0.05    | 0.10 | 0.643   | 0.00 |
| Negative Feelings | Pre                    | 0.84*** | 0.02 | < 0.001 | 2.24 |
|                   | SL vs. No SL           | 0.09    | 0.09 | 0.326   | 0.00 |
|                   | Framing vs. No Framing | -0.01   | 0.07 | 0.935   | 0.00 |
|                   | Interaction            | -0.13   | 0.11 | 0.244   | 0.00 |
| Overall Thriving  | Pre                    | 0.86*** | 0.02 | < 0.001 | 2.75 |
|                   | SL vs. No SL           | -0.01   | 0.09 | 0.878   | 0.00 |
|                   | Framing vs. No Framing | 0.04    | 0.06 | 0.499   | 0.00 |
|                   | Interaction            | 0.04    | 0.10 | 0.677   | 0.00 |
| Stress            | Pre                    | 0.81*** | 0.03 | < 0.001 | 1.76 |
|                   | SL vs. No SL           | -0.02   | 0.10 | 0.831   | 0.00 |
|                   | Framing vs. No Framing | 0.02    | 0.07 | 0.766   | 0.00 |
|                   | Interaction            | 0.07    | 0.12 | 0.540   | 0.00 |
| Depression        | Pre                    | 0.83*** | 0.02 | < 0.001 | 2.45 |
|                   | SL vs. No SL           | -0.03   | 0.09 | 0.750   | 0.00 |

|                             |                        |         |      |         |      |
|-----------------------------|------------------------|---------|------|---------|------|
|                             | Framing vs. No Framing | -0.06   | 0.06 | 0.346   | 0.00 |
|                             | Interaction            | 0.07    | 0.10 | 0.468   | 0.00 |
| Anxiety                     | Pre                    | 0.83*** | 0.03 | < 0.001 | 1.77 |
|                             | SL vs. No SL           | -0.08   | 0.10 | 0.444   | 0.00 |
|                             | Framing vs. No Framing | -0.04   | 0.08 | 0.585   | 0.00 |
|                             | Interaction            | 0.11    | 0.12 | 0.350   | 0.00 |
| Relatedness Satisfaction    | Pre                    | 0.77*** | 0.03 | < 0.001 | 1.23 |
|                             | SL vs. No SL           | 0.02    | 0.11 | 0.884   | 0.00 |
|                             | Framing vs. No Framing | -0.05   | 0.09 | 0.552   | 0.00 |
|                             | Interaction            | 0.11    | 0.13 | 0.417   | 0.00 |
| Relatedness Dissatisfaction | Pre                    | 0.70*** | 0.03 | < 0.001 | 0.91 |
|                             | SL vs. No SL           | 0.14    | 0.12 | 0.237   | 0.00 |
|                             | Framing vs. No Framing | 0.09    | 0.09 | 0.288   | 0.00 |
|                             | Interaction            | -0.23   | 0.14 | 0.095   | 0.00 |
| Autonomy Satisfaction       | Pre                    | 0.69*** | 0.03 | < 0.001 | 0.80 |
|                             | SL vs. No SL           | 0.05    | 0.13 | 0.676   | 0.00 |
|                             | Framing vs. No Framing | -0.04   | 0.09 | 0.697   | 0.00 |
|                             | Interaction            | -0.09   | 0.15 | 0.538   | 0.00 |
| Autonomy Dissatisfaction    | Pre                    | 0.73*** | 0.03 | < 0.001 | 0.98 |
|                             | SL vs. No SL           | 0.02    | 0.12 | 0.842   | 0.00 |
|                             | Framing vs. No Framing | 0.14    | 0.09 | 0.116   | 0.00 |
|                             | Interaction            | 0.03    | 0.14 | 0.805   | 0.00 |
| Competency Satisfaction     | Pre                    | 0.70*** | 0.03 | < 0.001 | 0.90 |
|                             | SL vs. No SL           | -0.15   | 0.12 | 0.216   | 0.00 |
|                             | Framing vs. No Framing | -0.12   | 0.09 | 0.192   | 0.00 |
|                             | Interaction            | 0.23    | 0.14 | 0.109   | 0.00 |
| Competency Dissatisfaction  | Pre                    | 0.68*** | 0.03 | < 0.001 | 0.95 |
|                             | SL vs. No SL           | 0.04    | 0.12 | 0.754   | 0.00 |
|                             | Framing vs. No Framing | 0.05    | 0.09 | 0.554   | 0.00 |
|                             | Interaction            | -0.10   | 0.13 | 0.469   | 0.00 |
| Relatedness Overall         | Pre                    | 0.83*** | 0.03 | < 0.001 | 1.51 |
|                             | SL vs. No SL           | -0.06   | 0.11 | 0.585   | 0.00 |
|                             | Framing vs. No Framing | -0.08   | 0.08 | 0.324   | 0.00 |
|                             | Interaction            | 0.20    | 0.13 | 0.118   | 0.00 |
| Autonomy Overall            | Pre                    | 0.80*** | 0.03 | < 0.001 | 1.34 |
|                             | SL vs. No SL           | 0.01    | 0.11 | 0.923   | 0.00 |
|                             | Framing vs. No Framing | -0.11   | 0.08 | 0.204   | 0.00 |
|                             | Interaction            | -0.06   | 0.13 | 0.670   | 0.00 |
| Competency Overall          | Pre                    | 0.78*** | 0.03 | < 0.001 | 1.51 |
|                             | SL vs. No SL           | -0.10   | 0.10 | 0.319   | 0.00 |
|                             | Framing vs. No Framing | -0.10   | 0.08 | 0.221   | 0.00 |
|                             | Interaction            | 0.20    | 0.12 | 0.103   | 0.00 |

*Note.* Estimates represent unstandardized regression weights in pre-intervention standard deviation units. Effect size is Cohen's  $f^2$  and can be interpreted as small = 0.02, medium = 0.15, large = 0.35.

Supplementary Table S11.

*All condition factors and interactions predicting post-test flourishing*

| <b>Variable</b> | <b>Predictor</b>       | <b>Estimate</b> | <b>SE</b> | <b>p</b> | <b>Effect Size</b> |
|-----------------|------------------------|-----------------|-----------|----------|--------------------|
| Support         | Pre                    | 0.85***         | 0.07      | < 0.001  | 0.28               |
|                 | SL vs. No SL           | -0.03           | 0.10      | 0.773    | 0.00               |
|                 | Framing vs. No Framing | -0.08           | 0.07      | 0.278    | 0.00               |
|                 | Pre * SL               | -0.12           | 0.10      | 0.228    | 0.00               |
|                 | Pre * Frame            | -0.06           | 0.08      | 0.422    | 0.00               |
|                 | SL * Frame             | 0.08            | 0.11      | 0.462    | 0.00               |
|                 | Three Way Interaction  | 0.13            | 0.12      | 0.287    | 0.00               |
| Community       | Pre                    | 0.83***         | 0.07      | < 0.001  | 0.27               |
|                 | SL vs. No SL           | -0.04           | 0.10      | 0.7      | 0.00               |
|                 | Framing vs. No Framing | 0.03            | 0.08      | 0.699    | 0.00               |
|                 | Pre * SL               | -0.08           | 0.10      | 0.418    | 0.00               |
|                 | Pre * Frame            | -0.06           | 0.08      | 0.42     | 0.00               |
|                 | SL * Frame             | -0.02           | 0.12      | 0.89     | 0.00               |
|                 | Three Way Interaction  | 0.15            | 0.12      | 0.216    | 0.00               |
| Trust           | Pre                    | 0.83***         | 0.06      | < 0.001  | 0.31               |
|                 | SL vs. No SL           | 0.15            | 0.10      | 0.162    | 0.00               |
|                 | Framing vs. No Framing | 0.09            | 0.08      | 0.244    | 0.00               |
|                 | Pre * SL               | -0.07           | 0.10      | 0.488    | 0.00               |
|                 | Pre * Frame            | -0.01           | 0.08      | 0.926    | 0.00               |
|                 | SL * Frame             | -0.13           | 0.12      | 0.266    | 0.00               |
|                 | Three Way Interaction  | 0.04            | 0.12      | 0.737    | 0.00               |
| Respect         | Pre                    | 0.77***         | 0.06      | < 0.001  | 0.30               |
|                 | SL vs. No SL           | 0.00            | 0.10      | 0.966    | 0.00               |
|                 | Framing vs. No Framing | -0.06           | 0.07      | 0.385    | 0.00               |
|                 | Pre * SL               | 0.05            | 0.11      | 0.679    | 0.00               |
|                 | Pre * Frame            | 0.03            | 0.07      | 0.704    | 0.00               |
|                 | SL * Frame             | 0.01            | 0.12      | 0.964    | 0.00               |
|                 | Three Way Interaction  | -0.10           | 0.12      | 0.415    | 0.00               |
| Loneliness      | Pre                    | 0.71***         | 0.05      | < 0.001  | 0.29               |
|                 | SL vs. No SL           | 0.01            | 0.09      | 0.919    | 0.00               |
|                 | Framing vs. No Framing | 0.02            | 0.07      | 0.792    | 0.00               |
|                 | Pre * SL               | 0.14            | 0.09      | 0.121    | 0.00               |
|                 | Pre * Frame            | 0.16*           | 0.06      | 0.012    | 0.01               |
|                 | SL * Frame             | 0.02            | 0.10      | 0.857    | 0.00               |
|                 | Three Way Interaction  | -0.12           | 0.10      | 0.246    | 0.00               |
| Belonging       | Pre                    | 0.92***         | 0.07      | < 0.001  | 0.32               |
|                 | SL vs. No SL           | 0.11            | 0.10      | 0.262    | 0.00               |
|                 | Framing vs. No Framing | 0.19*           | 0.08      | 0.012    | 0.01               |
|                 | Pre * SL               | 0.01            | 0.11      | 0.933    | 0.00               |

|                |                        |         |      |         |      |
|----------------|------------------------|---------|------|---------|------|
|                | Pre * Frame            | -0.11   | 0.08 | 0.174   | 0.00 |
|                | SL * Frame             | -0.15   | 0.12 | 0.22    | 0.00 |
|                | Three Way Interaction  | -0.02   | 0.12 | 0.841   | 0.00 |
| Engagement     | Pre                    | 0.73*** | 0.08 | < 0.001 | 0.14 |
|                | SL vs. No SL           | 0.08    | 0.12 | 0.496   | 0.00 |
|                | Framing vs. No Framing | 0.00    | 0.09 | 0.967   | 0.00 |
|                | Pre * SL               | -0.15   | 0.11 | 0.176   | 0.00 |
|                | Pre * Frame            | -0.07   | 0.09 | 0.461   | 0.00 |
|                | SL * Frame             | -0.11   | 0.14 | 0.447   | 0.00 |
|                | Three Way Interaction  | 0.19    | 0.13 | 0.163   | 0.00 |
| Skills         | Pre                    | 0.72*** | 0.07 | < 0.001 | 0.18 |
|                | SL vs. No SL           | -0.17   | 0.11 | 0.1     | 0.00 |
|                | Framing vs. No Framing | 0.07    | 0.08 | 0.398   | 0.00 |
|                | Pre * SL               | 0.03    | 0.10 | 0.781   | 0.00 |
|                | Pre * Frame            | 0.05    | 0.08 | 0.512   | 0.00 |
|                | SL * Frame             | 0.13    | 0.12 | 0.309   | 0.00 |
|                | Three Way Interaction  | -0.02   | 0.12 | 0.836   | 0.00 |
| Learning       | Pre                    | 0.45*** | 0.08 | < 0.001 | 0.05 |
|                | SL vs. No SL           | -0.13   | 0.13 | 0.3     | 0.00 |
|                | Framing vs. No Framing | -0.11   | 0.09 | 0.247   | 0.00 |
|                | Pre * SL               | 0.1     | 0.12 | 0.409   | 0.00 |
|                | Pre * Frame            | 0.18    | 0.10 | 0.06    | 0.01 |
|                | SL * Frame             | 0.12    | 0.15 | 0.41    | 0.00 |
|                | Three Way Interaction  | -0.06   | 0.14 | 0.667   | 0.00 |
| Accomplishment | Pre                    | 0.90*** | 0.06 | < 0.001 | 0.44 |
|                | SL vs. No SL           | 0.17*   | 0.09 | 0.044   | 0.01 |
|                | Framing vs. No Framing | 0.08    | 0.06 | 0.218   | 0.00 |
|                | Pre * SL               | 0.04    | 0.09 | 0.623   | 0.00 |
|                | Pre * Frame            | -0.05   | 0.06 | 0.424   | 0.00 |
|                | SL * Frame             | -0.10   | 0.10 | 0.328   | 0.00 |
|                | Three Way Interaction  | -0.01   | 0.10 | 0.891   | 0.00 |
| Self-Efficacy  | Pre                    | 0.83*** | 0.07 | < 0.001 | 0.28 |
|                | SL vs. No SL           | -0.07   | 0.10 | 0.483   | 0.00 |
|                | Framing vs. No Framing | -0.08   | 0.07 | 0.294   | 0.00 |
|                | Pre * SL               | 0.16    | 0.09 | 0.096   | 0.00 |
|                | Pre * Frame            | -0.02   | 0.08 | 0.775   | 0.00 |
|                | SL * Frame             | 0.06    | 0.12 | 0.622   | 0.00 |
|                | Three Way Interaction  | -0.16   | 0.11 | 0.166   | 0.00 |
| Self-Worth     | Pre                    | 0.67*** | 0.07 | < 0.001 | 0.18 |
|                | SL vs. No SL           | -0.09   | 0.10 | 0.408   | 0.00 |
|                | Framing vs. No Framing | -0.01   | 0.08 | 0.879   | 0.00 |
|                | Pre * SL               | 0.12    | 0.10 | 0.257   | 0.00 |
|                | Pre * Frame            | 0.09    | 0.08 | 0.231   | 0.00 |

|                   |                        |         |      |         |      |
|-------------------|------------------------|---------|------|---------|------|
|                   | SL * Frame             | 0.02    | 0.12 | 0.888   | 0.00 |
|                   | Three Way Interaction  | -0.03   | 0.12 | 0.811   | 0.00 |
| Control           | Pre                    | 0.78*** | 0.08 | < 0.001 | 0.15 |
|                   | SL vs. No SL           | 0.22    | 0.13 | 0.081   | 0.01 |
|                   | Framing vs. No Framing | 0.09    | 0.10 | 0.333   | 0.00 |
|                   | Pre * SL               | -0.01   | 0.13 | 0.962   | 0.00 |
|                   | Pre * Frame            | -0.15   | 0.09 | 0.112   | 0.00 |
|                   | SL * Frame             | -0.23   | 0.15 | 0.12    | 0.00 |
|                   | Three Way Interaction  | 0.08    | 0.15 | 0.604   | 0.00 |
| Meaning           | Pre                    | 0.85*** | 0.05 | < 0.001 | 0.44 |
|                   | SL vs. No SL           | -0.10   | 0.09 | 0.233   | 0.00 |
|                   | Framing vs. No Framing | 0.04    | 0.06 | 0.568   | 0.00 |
|                   | Pre * SL               | 0.01    | 0.08 | 0.928   | 0.00 |
|                   | Pre * Frame            | 0.02    | 0.06 | 0.762   | 0.00 |
|                   | SL * Frame             | 0.06    | 0.10 | 0.535   | 0.00 |
|                   | Three Way Interaction  | -0.01   | 0.10 | 0.948   | 0.00 |
| Optimism          | Pre                    | 0.86*** | 0.05 | < 0.001 | 0.45 |
|                   | SL vs. No SL           | -0.07   | 0.08 | 0.373   | 0.00 |
|                   | Framing vs. No Framing | 0.00    | 0.06 | 0.937   | 0.00 |
|                   | Pre * SL               | 0.03    | 0.08 | 0.71    | 0.00 |
|                   | Pre * Frame            | -0.05   | 0.06 | 0.394   | 0.00 |
|                   | SL * Frame             | 0.11    | 0.10 | 0.259   | 0.00 |
|                   | Three Way Interaction  | 0.03    | 0.09 | 0.772   | 0.00 |
| Life Satisfaction | Pre                    | 0.90*** | 0.05 | < 0.001 | 0.57 |
|                   | SL vs. No SL           | -0.03   | 0.08 | 0.677   | 0.00 |
|                   | Framing vs. No Framing | 0.05    | 0.06 | 0.36    | 0.00 |
|                   | Pre * SL               | -0.01   | 0.08 | 0.925   | 0.00 |
|                   | Pre * Frame            | -0.02   | 0.06 | 0.72    | 0.00 |
|                   | SL * Frame             | 0.07    | 0.09 | 0.417   | 0.00 |
|                   | Three Way Interaction  | 0.00    | 0.09 | 0.976   | 0.00 |
| Positive Feelings | Pre                    | 0.85*** | 0.05 | < 0.001 | 0.42 |
|                   | SL vs. No SL           | -0.03   | 0.09 | 0.692   | 0.00 |
|                   | Framing vs. No Framing | 0.05    | 0.06 | 0.476   | 0.00 |
|                   | Pre * SL               | 0.06    | 0.09 | 0.465   | 0.00 |
|                   | Pre * Frame            | -0.02   | 0.06 | 0.78    | 0.00 |
|                   | SL * Frame             | 0.05    | 0.10 | 0.627   | 0.00 |
|                   | Three Way Interaction  | -0.01   | 0.10 | 0.955   | 0.00 |
| Negative Feelings | Pre                    | 0.75*** | 0.06 | < 0.001 | 0.26 |
|                   | SL vs. No SL           | 0.10    | 0.09 | 0.26    | 0.00 |
|                   | Framing vs. No Framing | 0.00    | 0.07 | 0.988   | 0.00 |
|                   | Pre * SL               | 0.15    | 0.09 | 0.108   | 0.00 |
|                   | Pre * Frame            | 0.05    | 0.07 | 0.48    | 0.00 |
|                   | SL * Frame             | -0.15   | 0.11 | 0.172   | 0.00 |



|                             |                        |         |      |         |      |
|-----------------------------|------------------------|---------|------|---------|------|
|                             | Three Way Interaction  | -0.03   | 0.11 | 0.804   | 0.00 |
| Overall Thriving            | Pre                    | 0.83*** | 0.06 | < 0.001 | 0.36 |
|                             | SL vs. No SL           | -0.02   | 0.09 | 0.827   | 0.00 |
|                             | Framing vs. No Framing | 0.04    | 0.06 | 0.517   | 0.00 |
|                             | Pre * SL               | 0.10    | 0.09 | 0.269   | 0.00 |
|                             | Pre * Frame            | -0.01   | 0.07 | 0.865   | 0.00 |
|                             | SL * Frame             | 0.05    | 0.10 | 0.612   | 0.00 |
|                             | Three Way Interaction  | 0.00    | 0.10 | 0.963   | 0.00 |
| Stress                      | Pre                    | 0.83*** | 0.07 | < 0.001 | 0.24 |
|                             | SL vs. No SL           | -0.03   | 0.10 | 0.738   | 0.00 |
|                             | Framing vs. No Framing | 0.02    | 0.07 | 0.783   | 0.00 |
|                             | Pre * SL               | -0.13   | 0.11 | 0.236   | 0.00 |
|                             | Pre * Frame            | -0.04   | 0.08 | 0.641   | 0.00 |
|                             | SL * Frame             | 0.08    | 0.12 | 0.492   | 0.00 |
|                             | Three Way Interaction  | 0.21    | 0.12 | 0.08    | 0.01 |
| Depression                  | Pre                    | 0.80*** | 0.06 | < 0.001 | 0.32 |
|                             | SL vs. No SL           | -0.03   | 0.09 | 0.742   | 0.00 |
|                             | Framing vs. No Framing | -0.06   | 0.07 | 0.37    | 0.00 |
|                             | Pre * SL               | -0.07   | 0.09 | 0.407   | 0.00 |
|                             | Pre * Frame            | 0.01    | 0.07 | 0.873   | 0.00 |
|                             | SL * Frame             | 0.07    | 0.10 | 0.498   | 0.00 |
|                             | Three Way Interaction  | 0.16    | 0.10 | 0.125   | 0.00 |
| Anxiety                     | Pre                    | 0.75*** | 0.08 | < 0.001 | 0.15 |
|                             | SL vs. No SL           | -0.08   | 0.10 | 0.459   | 0.00 |
|                             | Framing vs. No Framing | -0.04   | 0.08 | 0.631   | 0.00 |
|                             | Pre * SL               | 0.06    | 0.12 | 0.603   | 0.00 |
|                             | Pre * Frame            | 0.09    | 0.09 | 0.292   | 0.00 |
|                             | SL * Frame             | 0.11    | 0.12 | 0.366   | 0.00 |
|                             | Three Way Interaction  | -0.04   | 0.14 | 0.757   | 0.00 |
| Relatedness Satisfaction    | Pre                    | 0.76*** | 0.08 | < 0.001 | 0.17 |
|                             | SL vs. No SL           | 0.02    | 0.12 | 0.876   | 0.00 |
|                             | Framing vs. No Framing | -0.05   | 0.09 | 0.546   | 0.00 |
|                             | Pre * SL               | 0.04    | 0.11 | 0.731   | 0.00 |
|                             | Pre * Frame            | 0.01    | 0.09 | 0.866   | 0.00 |
|                             | SL * Frame             | 0.11    | 0.13 | 0.426   | 0.00 |
|                             | Three Way Interaction  | -0.05   | 0.13 | 0.708   | 0.00 |
| Relatedness Dissatisfaction | Pre                    | 0.69*** | 0.08 | < 0.001 | 0.12 |
|                             | SL vs. No SL           | 0.14    | 0.12 | 0.236   | 0.00 |
|                             | Framing vs. No Framing | 0.10    | 0.09 | 0.284   | 0.00 |
|                             | Pre * SL               | 0.10    | 0.13 | 0.435   | 0.00 |
|                             | Pre * Frame            | 0.01    | 0.09 | 0.886   | 0.00 |

|                            |                        |          |      |         |      |
|----------------------------|------------------------|----------|------|---------|------|
|                            | SL * Frame             | -0.23    | 0.14 | 0.098   | 0.00 |
|                            | Three Way Interaction  | -0.12    | 0.15 | 0.414   | 0.00 |
| Autonomy Satisfaction      | Pre                    | 0.55***  | 0.08 | < 0.001 | 0.08 |
|                            | SL vs. No SL           | 0.04     | 0.13 | 0.77    | 0.00 |
|                            | Framing vs. No Framing | -0.05    | 0.09 | 0.601   | 0.00 |
|                            | Pre * SL               | 0.22     | 0.12 | 0.078   | 0.01 |
|                            | Pre * Frame            | 0.16     | 0.09 | 0.08    | 0.01 |
|                            | SL * Frame             | -0.07    | 0.15 | 0.619   | 0.00 |
|                            | Three Way Interaction  | -0.24    | 0.14 | 0.103   | 0.00 |
| Autonomy Dissatisfaction   | Pre                    | 0.63***  | 0.08 | < 0.001 | 0.11 |
|                            | SL vs. No SL           | 0.04     | 0.12 | 0.737   | 0.00 |
|                            | Framing vs. No Framing | 0.14     | 0.09 | 0.116   | 0.00 |
|                            | Pre * SL               | 0.27*    | 0.14 | 0.047   | 0.01 |
|                            | Pre * Frame            | 0.09     | 0.09 | 0.346   | 0.00 |
|                            | SL * Frame             | 0.02     | 0.14 | 0.899   | 0.00 |
|                            | Three Way Interaction  | -0.21    | 0.15 | 0.163   | 0.00 |
| Competency Satisfaction    | Pre                    | 0.55***  | 0.08 | < 0.001 | 0.09 |
|                            | SL vs. No SL           | -0.16    | 0.12 | 0.186   | 0.00 |
|                            | Framing vs. No Framing | -0.12    | 0.09 | 0.165   | 0.00 |
|                            | Pre * SL               | 0.44***  | 0.12 | < 0.001 | 0.02 |
|                            | Pre * Frame            | 0.16     | 0.09 | 0.074   | 0.01 |
|                            | SL * Frame             | 0.23     | 0.14 | 0.096   | 0.00 |
|                            | Three Way Interaction  | -0.49*** | 0.14 | < 0.001 | 0.02 |
| Competency Dissatisfaction | Pre                    | 0.66***  | 0.07 | < 0.001 | 0.14 |
|                            | SL vs. No SL           | 0.03     | 0.12 | 0.783   | 0.00 |
|                            | Framing vs. No Framing | 0.05     | 0.09 | 0.545   | 0.00 |
|                            | Pre * SL               | -0.08    | 0.12 | 0.479   | 0.00 |
|                            | Pre * Frame            | 0.01     | 0.08 | 0.866   | 0.00 |
|                            | SL * Frame             | -0.10    | 0.13 | 0.46    | 0.00 |
|                            | Three Way Interaction  | 0.15     | 0.14 | 0.263   | 0.00 |
| Relatedness Overall        | Pre                    | 0.83***  | 0.07 | < 0.001 | 0.22 |
|                            | SL vs. No SL           | -0.06    | 0.11 | 0.587   | 0.00 |
|                            | Framing vs. No Framing | -0.08    | 0.08 | 0.322   | 0.00 |
|                            | Pre * SL               | 0.00     | 0.11 | 0.994   | 0.00 |
|                            | Pre * Frame            | 0.01     | 0.08 | 0.872   | 0.00 |
|                            | SL * Frame             | 0.20     | 0.13 | 0.121   | 0.00 |
|                            | Three Way Interaction  | -0.03    | 0.13 | 0.805   | 0.00 |
| Autonomy Overall           | Pre                    | 0.72***  | 0.08 | < 0.001 | 0.15 |
|                            | SL vs. No SL           | 0.00     | 0.11 | 0.973   | 0.00 |
|                            | Framing vs. No Framing | -0.11    | 0.08 | 0.19    | 0.00 |

|                    |                        |         |      |         |      |
|--------------------|------------------------|---------|------|---------|------|
|                    | Pre * SL               | 0.20    | 0.12 | 0.095   | 0.00 |
|                    | Pre * Frame            | 0.07    | 0.09 | 0.412   | 0.00 |
|                    | SL * Frame             | -0.04   | 0.13 | 0.754   | 0.00 |
|                    | Three Way Interaction  | -0.19   | 0.14 | 0.173   | 0.00 |
| Competency Overall | Pre                    | 0.68*** | 0.07 | < 0.001 | 0.18 |
|                    | SL vs. No SL           | -0.11   | 0.10 | 0.276   | 0.00 |
|                    | Framing vs. No Framing | -0.10   | 0.08 | 0.188   | 0.00 |
|                    | Pre * SL               | 0.17    | 0.10 | 0.087   | 0.01 |
|                    | Pre * Frame            | 0.11    | 0.08 | 0.152   | 0.00 |
|                    | SL * Frame             | 0.21    | 0.12 | 0.084   | 0.01 |
|                    | Three Way Interaction  | -0.16   | 0.12 | 0.185   | 0.00 |

*Note.* Estimates represent unstandardized regression weights in pre-intervention standard deviation units. Effect size is Cohen's  $f^2$  and can be interpreted as small = 0.02, medium = 0.15, large = 0.35.

Supplementary Table S12.

*Latent immersion factor predicting well-being*

| <b>Variable</b> | <b>Predictor</b> | <b>Estimate</b> | <b>SE</b> | <b>p</b> | <b>Effect Size</b> |
|-----------------|------------------|-----------------|-----------|----------|--------------------|
| Support         | Pre              | 0.80***         | 0.02      | < 0.001  | 1.76               |
|                 | Immersion        | 0.01            | 0.02      | 0.652    | 0.00               |
|                 | Interaction      | 0.04            | 0.02      | 0.06     | 0.00               |
| Community       | Pre              | 0.78***         | 0.03      | < 0.001  | 1.52               |
|                 | Immersion        | 0.03            | 0.02      | 0.202    | 0.00               |
|                 | Interaction      | -0.01           | 0.02      | 0.741    | 0.00               |
| Trust           | Pre              | 0.81***         | 0.03      | < 0.001  | 1.61               |
|                 | Immersion        | -0.01           | 0.02      | 0.77     | 0.00               |
|                 | Interaction      | 0.04            | 0.02      | 0.105    | 0.00               |
| Respect         | Pre              | 0.77***         | 0.03      | < 0.001  | 1.57               |
|                 | Immersion        | 0.05*           | 0.02      | 0.031    | 0.01               |
|                 | Interaction      | 0.01            | 0.02      | 0.768    | 0.01               |
| Loneliness      | Pre              | 0.84***         | 0.02      | < 0.001  | 2.32               |
|                 | Immersion        | -0.02           | 0.02      | 0.307    | 0.00               |
|                 | Interaction      | 0.01            | 0.02      | 0.689    | 0.00               |
| Belonging       | Pre              | 0.83***         | 0.03      | < 0.001  | 1.74               |
|                 | Immersion        | 0.04            | 0.02      | 0.123    | 0.00               |
|                 | Interaction      | -0.03           | 0.02      | 0.217    | 0.00               |
| Engagement      | Pre              | 0.63***         | 0.03      | < 0.001  | 0.70               |
|                 | Immersion        | 0.13***         | 0.03      | < 0.001  | 0.03               |
|                 | Interaction      | -0.01           | 0.03      | 0.673    | 0.03               |
| Skills          | Pre              | 0.76***         | 0.03      | < 0.001  | 1.34               |
|                 | Immersion        | 0.02            | 0.03      | 0.505    | 0.00               |
|                 | Interaction      | -0.01           | 0.02      | 0.661    | 0.00               |
| Learning        | Pre              | 0.58***         | 0.03      | < 0.001  | 0.54               |
|                 | Immersion        | 0.11***         | 0.03      | < 0.001  | 0.02               |
|                 | Interaction      | 0.02            | 0.03      | 0.458    | 0.02               |
| Accomplishment  | Pre              | 0.87***         | 0.02      | < 0.001  | 2.82               |
|                 | Immersion        | 0.03            | 0.02      | 0.142    | 0.00               |
|                 | Interaction      | 0.00            | 0.02      | 0.887    | 0.00               |
| Self-Efficacy   | Pre              | 0.84***         | 0.03      | < 0.001  | 1.89               |
|                 | Immersion        | 0.01            | 0.02      | 0.638    | 0.00               |
|                 | Interaction      | -0.02           | 0.03      | 0.414    | 0.00               |
| Self-Worth      | Pre              | 0.77***         | 0.03      | < 0.001  | 1.48               |
|                 | Immersion        | 0.01            | 0.02      | 0.741    | 0.00               |
|                 | Interaction      | 0.04            | 0.02      | 0.063    | 0.00               |
| Control         | Pre              | 0.68***         | 0.03      | < 0.001  | 0.77               |
|                 | Immersion        | 0.03            | 0.03      | 0.355    | 0.00               |
|                 | Interaction      | 0.04            | 0.03      | 0.206    | 0.00               |

|                             |             |         |      |         |      |
|-----------------------------|-------------|---------|------|---------|------|
| Meaning                     | Pre         | 0.86*** | 0.02 | < 0.001 | 2.72 |
|                             | Immersion   | 0.04*   | 0.02 | 0.046   | 0.01 |
|                             | Interaction | -0.02   | 0.02 | 0.326   | 0.01 |
| Optimism                    | Pre         | 0.84*** | 0.02 | < 0.001 | 2.74 |
|                             | Immersion   | 0.01    | 0.02 | 0.647   | 0.00 |
|                             | Interaction | -0.01   | 0.02 | 0.644   | 0.00 |
| Life Satisfaction           | Pre         | 0.88*** | 0.02 | < 0.001 | 3.66 |
|                             | Immersion   | 0.02    | 0.02 | 0.192   | 0.00 |
|                             | Interaction | 0.02    | 0.02 | 0.308   | 0.00 |
| Positive Feelings           | Pre         | 0.86*** | 0.02 | < 0.001 | 2.67 |
|                             | Immersion   | 0.01    | 0.02 | 0.696   | 0.00 |
|                             | Interaction | 0.00    | 0.02 | 0.86    | 0.00 |
| Negative Feelings           | Pre         | 0.84*** | 0.02 | < 0.001 | 2.22 |
|                             | Immersion   | -0.03   | 0.02 | 0.171   | 0.00 |
|                             | Interaction | -0.01   | 0.02 | 0.696   | 0.00 |
| Overall Thriving            | Pre         | 0.86*** | 0.02 | < 0.001 | 2.69 |
|                             | Immersion   | 0.01    | 0.02 | 0.567   | 0.00 |
|                             | Interaction | 0.02    | 0.02 | 0.315   | 0.00 |
| Stress                      | Pre         | 0.81*** | 0.03 | < 0.001 | 1.72 |
|                             | Immersion   | 0.05*   | 0.02 | 0.048   | 0.01 |
|                             | Interaction | 0.01    | 0.03 | 0.592   | 0.01 |
| Depression                  | Pre         | 0.83*** | 0.02 | < 0.001 | 2.47 |
|                             | Immersion   | 0.02    | 0.02 | 0.289   | 0.00 |
|                             | Interaction | 0.02    | 0.02 | 0.293   | 0.00 |
| Anxiety                     | Pre         | 0.82*** | 0.03 | < 0.001 | 1.64 |
|                             | Immersion   | 0.05*   | 0.02 | 0.042   | 0.01 |
|                             | Interaction | 0.04    | 0.03 | 0.178   | 0.01 |
| Relatedness Satisfaction    | Pre         | 0.77*** | 0.03 | < 0.001 | 1.17 |
|                             | Immersion   | 0.00    | 0.03 | 0.966   | 0.00 |
|                             | Interaction | 0.01    | 0.03 | 0.831   | 0.00 |
| Relatedness Dissatisfaction | Pre         | 0.70*** | 0.03 | < 0.001 | 0.90 |
|                             | Immersion   | -0.03   | 0.03 | 0.339   | 0.00 |
|                             | Interaction | 0.00    | 0.03 | 0.885   | 0.00 |
| Autonomy Satisfaction       | Pre         | 0.68*** | 0.03 | < 0.001 | 0.79 |
|                             | Immersion   | 0.09**  | 0.03 | 0.003   | 0.02 |
|                             | Interaction | -0.03   | 0.03 | 0.387   | 0.02 |
| Autonomy Dissatisfaction    | Pre         | 0.73*** | 0.03 | < 0.001 | 0.96 |
|                             | Immersion   | -0.01   | 0.03 | 0.855   | 0.00 |
|                             | Interaction | 0.03    | 0.03 | 0.274   | 0.00 |
| Competency Satisfaction     | Pre         | 0.70*** | 0.03 | < 0.001 | 0.86 |
|                             | Immersion   | 0.02    | 0.03 | 0.521   | 0.00 |
|                             | Interaction | 0.04    | 0.03 | 0.152   | 0.00 |
| Competency Dissatisfaction  | Pre         | 0.68*** | 0.03 | < 0.001 | 0.94 |

|                     |             |         |      |         |      |
|---------------------|-------------|---------|------|---------|------|
|                     | Immersion   | 0.04    | 0.03 | 0.129   | 0.00 |
|                     | Interaction | 0.05    | 0.03 | 0.053   | 0.00 |
| Relatedness Overall | Pre         | 0.82*** | 0.03 | < 0.001 | 1.46 |
|                     | Immersion   | 0.01    | 0.03 | 0.74    | 0.00 |
|                     | Interaction | -0.02   | 0.03 | 0.482   | 0.00 |
| Autonomy Overall    | Pre         | 0.80*** | 0.03 | < 0.001 | 1.32 |
|                     | Immersion   | 0.05    | 0.03 | 0.067   | 0.01 |
|                     | Interaction | -0.02   | 0.03 | 0.502   | 0.01 |
| Competency Overall  | Pre         | 0.78*** | 0.03 | < 0.001 | 1.50 |
|                     | Immersion   | -0.03   | 0.02 | 0.254   | 0.00 |
|                     | Interaction | 0.07**  | 0.03 | 0.008   | 0.00 |

*Note.* Estimates represent unstandardized regression weights in pre-intervention standard deviation units. Effect size is Cohen's  $f^2$  and can be interpreted as small = 0.02, medium = 0.15, large = 0.35.

Supplementary Table S13.

*Latent art topic factor predicting well-being*

| <b>Variable</b> | <b>Predictor</b> | <b>Estimate</b> | <b>SE</b> | <b>p</b> | <b>Effect Size</b> |
|-----------------|------------------|-----------------|-----------|----------|--------------------|
| Support         | Pre              | 0.80***         | 0.02      | < 0.001  | 1.79               |
|                 | Art Topics       | -0.02           | 0.24      | 0.932    | 0.00               |
|                 | Interaction      | 0.21            | 0.25      | 0.402    | 0.00               |
| Community       | Pre              | 0.80***         | 0.03      | < 0.001  | 1.62               |
|                 | Art Topics       | -0.56*          | 0.26      | 0.028    | 0.01               |
|                 | Interaction      | 0.14            | 0.26      | 0.588    | 0.01               |
| Trust           | Pre              | 0.81***         | 0.03      | < 0.001  | 1.63               |
|                 | Art Topics       | 0.47            | 0.26      | 0.073    | 0.01               |
|                 | Interaction      | -0.18           | 0.27      | 0.515    | 0.01               |
| Respect         | Pre              | 0.77***         | 0.03      | < 0.001  | 1.58               |
|                 | Art Topics       | 0.22            | 0.25      | 0.379    | 0.00               |
|                 | Interaction      | -0.18           | 0.27      | 0.506    | 0.00               |
| Loneliness      | Pre              | 0.85***         | 0.02      | < 0.001  | 2.38               |
|                 | Art Topics       | -0.27           | 0.23      | 0.228    | 0.00               |
|                 | Interaction      | 0.21            | 0.23      | 0.375    | 0.00               |
| Belonging       | Pre              | 0.84***         | 0.03      | < 0.001  | 1.80               |
|                 | Art Topics       | -0.17           | 0.26      | 0.51     | 0.00               |
|                 | Interaction      | -0.08           | 0.26      | 0.742    | 0.00               |
| Engagement      | Pre              | 0.66***         | 0.03      | < 0.001  | 0.80               |
|                 | Art Topics       | -0.06           | 0.30      | 0.84     | 0.00               |
|                 | Interaction      | -0.51           | 0.32      | 0.111    | 0.00               |
| Skills          | Pre              | 0.76***         | 0.03      | < 0.001  | 1.41               |
|                 | Art Topics       | -0.01           | 0.27      | 0.956    | 0.00               |
|                 | Interaction      | -0.12           | 0.27      | 0.668    | 0.00               |
| Learning        | Pre              | 0.61***         | 0.03      | < 0.001  | 0.59               |
|                 | Art Topics       | 0.10            | 0.32      | 0.754    | 0.00               |
|                 | Interaction      | 0.46            | 0.30      | 0.132    | 0.00               |
| Accomplishment  | Pre              | 0.87***         | 0.02      | < 0.001  | 2.85               |
|                 | Art Topics       | 0.07            | 0.22      | 0.737    | 0.00               |
|                 | Interaction      | -0.06           | 0.21      | 0.778    | 0.00               |
| Self-Efficacy   | Pre              | 0.84***         | 0.03      | < 0.001  | 1.93               |
|                 | Art Topics       | 0.07            | 0.25      | 0.788    | 0.00               |
|                 | Interaction      | 0.06            | 0.25      | 0.808    | 0.00               |
| Self-Worth      | Pre              | 0.77***         | 0.03      | < 0.001  | 1.49               |
|                 | Art Topics       | -0.07           | 0.26      | 0.79     | 0.00               |
|                 | Interaction      | -0.20           | 0.26      | 0.437    | 0.00               |
| Control         | Pre              | 0.68***         | 0.03      | < 0.001  | 0.77               |
|                 | Art Topics       | -0.27           | 0.32      | 0.394    | 0.00               |
|                 | Interaction      | -0.13           | 0.34      | 0.695    | 0.00               |

|                             |             |         |      |         |      |
|-----------------------------|-------------|---------|------|---------|------|
| Meaning                     | Pre         | 0.87*** | 0.02 | < 0.001 | 2.77 |
|                             | Art Topics  | 0.19    | 0.22 | 0.386   | 0.00 |
|                             | Interaction | 0.15    | 0.21 | 0.48    | 0.00 |
| Optimism                    | Pre         | 0.84*** | 0.02 | < 0.001 | 2.78 |
|                             | Art Topics  | 0.13    | 0.21 | 0.52    | 0.00 |
|                             | Interaction | -0.18   | 0.21 | 0.383   | 0.00 |
| Life Satisfaction           | Pre         | 0.88*** | 0.02 | < 0.001 | 3.69 |
|                             | Art Topics  | -0.10   | 0.19 | 0.618   | 0.00 |
|                             | Interaction | -0.31   | 0.19 | 0.105   | 0.00 |
| Positive Feelings           | Pre         | 0.86*** | 0.02 | < 0.001 | 2.73 |
|                             | Art Topics  | 0.29    | 0.21 | 0.172   | 0.00 |
|                             | Interaction | -0.41   | 0.22 | 0.07    | 0.00 |
| Negative Feelings           | Pre         | 0.84*** | 0.02 | < 0.001 | 2.27 |
|                             | Art Topics  | -0.61** | 0.23 | 0.009   | 0.01 |
|                             | Interaction | -0.32   | 0.24 | 0.18    | 0.01 |
| Overall Thriving            | Pre         | 0.86*** | 0.02 | < 0.001 | 2.77 |
|                             | Art Topics  | 0.44*   | 0.21 | 0.038   | 0.01 |
|                             | Interaction | -0.37   | 0.22 | 0.093   | 0.01 |
| Stress                      | Pre         | 0.81*** | 0.03 | < 0.001 | 1.76 |
|                             | Art Topics  | -0.44   | 0.25 | 0.083   | 0.01 |
|                             | Interaction | -0.49   | 0.27 | 0.067   | 0.01 |
| Depression                  | Pre         | 0.83*** | 0.02 | < 0.001 | 2.45 |
|                             | Art Topics  | -0.23   | 0.22 | 0.297   | 0.00 |
|                             | Interaction | -0.38   | 0.23 | 0.107   | 0.00 |
| Anxiety                     | Pre         | 0.83*** | 0.03 | < 0.001 | 1.76 |
|                             | Art Topics  | -0.40   | 0.26 | 0.117   | 0.00 |
|                             | Interaction | -0.57*  | 0.28 | 0.044   | 0.00 |
| Relatedness Satisfaction    | Pre         | 0.77*** | 0.03 | < 0.001 | 1.22 |
|                             | Art Topics  | 0.05    | 0.29 | 0.859   | 0.00 |
|                             | Interaction | 0.02    | 0.28 | 0.942   | 0.00 |
| Relatedness Dissatisfaction | Pre         | 0.70*** | 0.03 | < 0.001 | 0.91 |
|                             | Art Topics  | -0.21   | 0.30 | 0.475   | 0.00 |
|                             | Interaction | -0.47   | 0.30 | 0.124   | 0.00 |
| Autonomy Satisfaction       | Pre         | 0.69*** | 0.03 | < 0.001 | 0.80 |
|                             | Art Topics  | 0.10    | 0.32 | 0.745   | 0.00 |
|                             | Interaction | -0.02   | 0.33 | 0.957   | 0.00 |
| Autonomy Dissatisfaction    | Pre         | 0.73*** | 0.03 | < 0.001 | 0.98 |
|                             | Art Topics  | 0.16    | 0.30 | 0.6     | 0.00 |
|                             | Interaction | -0.18   | 0.30 | 0.548   | 0.00 |
| Competency Satisfaction     | Pre         | 0.70*** | 0.03 | < 0.001 | 0.90 |
|                             | Art Topics  | 0.15    | 0.30 | 0.613   | 0.00 |
|                             | Interaction | 0.37    | 0.29 | 0.21    | 0.00 |
| Competency Dissatisfaction  | Pre         | 0.68*** | 0.03 | < 0.001 | 0.95 |



|                     |             |         |      |         |      |
|---------------------|-------------|---------|------|---------|------|
|                     | Art Topics  | 0.03    | 0.29 | 0.931   | 0.00 |
|                     | Interaction | -0.56   | 0.29 | 0.053   | 0.00 |
| Relatedness Overall | Pre         | 0.82*** | 0.03 | < 0.001 | 1.49 |
|                     | Art Topics  | 0.13    | 0.28 | 0.641   | 0.00 |
|                     | Interaction | -0.16   | 0.28 | 0.574   | 0.00 |
| Autonomy Overall    | Pre         | 0.80*** | 0.03 | < 0.001 | 1.33 |
|                     | Art Topics  | -0.08   | 0.28 | 0.771   | 0.00 |
|                     | Interaction | 0.00    | 0.29 | 0.997   | 0.00 |
| Competency Overall  | Pre         | 0.78*** | 0.03 | < 0.001 | 1.51 |
|                     | Art Topics  | 0.11    | 0.26 | 0.682   | 0.00 |
|                     | Interaction | -0.34   | 0.26 | 0.193   | 0.00 |

*Note.* Estimates represent unstandardized regression weights in pre-intervention standard deviation units. Effect size is Cohen's  $f^2$  and can be interpreted as small = 0.02, medium = 0.15, large = 0.35.

Supplementary Table S14.

*Latent feeling topic factor predicting well-being*

| <b>Variable</b> | <b>Predictor</b> | <b>Estimate</b> | <b>SE</b> | <b>p</b> | <b>Effect Size</b> |
|-----------------|------------------|-----------------|-----------|----------|--------------------|
| Support         | Pre              | 0.79***         | 0.02      | < 0.001  | 1.79               |
|                 | Feeling Topics   | -0.24           | 0.23      | 0.297    | 0.00               |
|                 | Interaction      | 0.15            | 0.24      | 0.531    | 0.00               |
| Community       | Pre              | 0.79***         | 0.03      | < 0.001  | 1.61               |
|                 | Feeling Topics   | 0.13            | 0.25      | 0.613    | 0.00               |
|                 | Interaction      | 0.06            | 0.24      | 0.813    | 0.00               |
| Trust           | Pre              | 0.81***         | 0.03      | < 0.001  | 1.63               |
|                 | Feeling Topics   | -0.23           | 0.25      | 0.354    | 0.00               |
|                 | Interaction      | -0.15           | 0.25      | 0.541    | 0.00               |
| Respect         | Pre              | 0.77***         | 0.03      | < 0.001  | 1.56               |
|                 | Feeling Topics   | -0.37           | 0.24      | 0.125    | 0.00               |
|                 | Interaction      | 0.37            | 0.25      | 0.142    | 0.00               |
| Loneliness      | Pre              | 0.85***         | 0.02      | < 0.001  | 2.39               |
|                 | Feeling Topics   | 0.42            | 0.22      | 0.054    | 0.01               |
|                 | Interaction      | -0.01           | 0.23      | 0.957    | 0.01               |
| Belonging       | Pre              | 0.84***         | 0.03      | < 0.001  | 1.80               |
|                 | Feeling Topics   | -0.13           | 0.25      | 0.607    | 0.00               |
|                 | Interaction      | 0.01            | 0.24      | 0.953    | 0.00               |
| Engagement      | Pre              | 0.66***         | 0.03      | < 0.001  | 0.80               |
|                 | Feeling Topics   | -0.07           | 0.29      | 0.814    | 0.00               |
|                 | Interaction      | 0.05            | 0.30      | 0.876    | 0.00               |
| Skills          | Pre              | 0.76***         | 0.03      | < 0.001  | 1.41               |
|                 | Feeling Topics   | -0.03           | 0.26      | 0.918    | 0.00               |
|                 | Interaction      | 0.3             | 0.26      | 0.266    | 0.00               |
| Learning        | Pre              | 0.60***         | 0.03      | < 0.001  | 0.59               |
|                 | Feeling Topics   | -0.05           | 0.31      | 0.881    | 0.00               |
|                 | Interaction      | -0.01           | 0.28      | 0.985    | 0.00               |
| Accomplishment  | Pre              | 0.87***         | 0.02      | < 0.001  | 2.85               |
|                 | Feeling Topics   | -0.21           | 0.21      | 0.32     | 0.00               |
|                 | Interaction      | -0.01           | 0.21      | 0.951    | 0.00               |
| Self-Efficacy   | Pre              | 0.84***         | 0.03      | < 0.001  | 1.93               |
|                 | Feeling Topics   | -0.21           | 0.24      | 0.372    | 0.00               |
|                 | Interaction      | -0.06           | 0.24      | 0.79     | 0.00               |
| Self-Worth      | Pre              | 0.77***         | 0.03      | < 0.001  | 1.52               |
|                 | Feeling Topics   | 0.05            | 0.25      | 0.857    | 0.00               |
|                 | Interaction      | 0.76**          | 0.25      | 0.003    | 0.00               |
| Control         | Pre              | 0.69***         | 0.03      | < 0.001  | 0.77               |
|                 | Feeling Topics   | 0.08            | 0.31      | 0.793    | 0.00               |
|                 | Interaction      | 0.02            | 0.32      | 0.945    | 0.00               |

|                             |                |         |      |         |      |
|-----------------------------|----------------|---------|------|---------|------|
| Meaning                     | Pre            | 0.87*** | 0.02 | < 0.001 | 2.77 |
|                             | Feeling Topics | -0.28   | 0.21 | 0.174   | 0.00 |
|                             | Interaction    | 0.02    | 0.20 | 0.939   | 0.00 |
| Optimism                    | Pre            | 0.84*** | 0.02 | < 0.001 | 2.80 |
|                             | Feeling Topics | -0.18   | 0.20 | 0.379   | 0.00 |
|                             | Interaction    | 0.25    | 0.20 | 0.213   | 0.00 |
| Life Satisfaction           | Pre            | 0.88*** | 0.02 | < 0.001 | 3.68 |
|                             | Feeling Topics | -0.11   | 0.18 | 0.545   | 0.00 |
|                             | Interaction    | 0.16    | 0.19 | 0.406   | 0.00 |
| Positive Feelings           | Pre            | 0.86*** | 0.02 | < 0.001 | 2.75 |
|                             | Feeling Topics | -0.52*  | 0.21 | 0.012   | 0.01 |
|                             | Interaction    | 0.13    | 0.21 | 0.537   | 0.01 |
| Negative Feelings           | Pre            | 0.84*** | 0.02 | < 0.001 | 2.27 |
|                             | Feeling Topics | 0.8***  | 0.22 | < 0.001 | 0.02 |
|                             | Interaction    | 0.37    | 0.22 | 0.101   | 0.02 |
| Overall Thriving            | Pre            | 0.86*** | 0.02 | < 0.001 | 2.77 |
|                             | Feeling Topics | -0.65** | 0.20 | 0.002   | 0.02 |
|                             | Interaction    | 0.44*   | 0.21 | 0.034   | 0.02 |
| Stress                      | Pre            | 0.81*** | 0.03 | < 0.001 | 1.73 |
|                             | Feeling Topics | 0.66**  | 0.24 | 0.006   | 0.01 |
|                             | Interaction    | 0.40    | 0.25 | 0.117   | 0.01 |
| Depression                  | Pre            | 0.82*** | 0.02 | < 0.001 | 2.41 |
|                             | Feeling Topics | 0.49*   | 0.21 | 0.02    | 0.01 |
|                             | Interaction    | 0.53*   | 0.22 | 0.015   | 0.01 |
| Anxiety                     | Pre            | 0.83*** | 0.03 | < 0.001 | 1.69 |
|                             | Feeling Topics | 0.18    | 0.25 | 0.462   | 0.00 |
|                             | Interaction    | 0.31    | 0.26 | 0.232   | 0.00 |
| Relatedness Satisfaction    | Pre            | 0.77*** | 0.03 | < 0.001 | 1.23 |
|                             | Feeling Topics | -0.51   | 0.28 | 0.068   | 0.01 |
|                             | Interaction    | 0.2     | 0.28 | 0.466   | 0.01 |
| Relatedness Dissatisfaction | Pre            | 0.70*** | 0.03 | < 0.001 | 0.90 |
|                             | Feeling Topics | 0.35    | 0.29 | 0.232   | 0.00 |
|                             | Interaction    | 0.27    | 0.28 | 0.339   | 0.00 |
| Autonomy Satisfaction       | Pre            | 0.68*** | 0.03 | < 0.001 | 0.78 |
|                             | Feeling Topics | -0.43   | 0.30 | 0.162   | 0.00 |
|                             | Interaction    | 0.38    | 0.31 | 0.223   | 0.00 |
| Autonomy Dissatisfaction    | Pre            | 0.73*** | 0.03 | < 0.001 | 0.97 |
|                             | Feeling Topics | 0.26    | 0.29 | 0.362   | 0.00 |
|                             | Interaction    | 0.31    | 0.29 | 0.286   | 0.00 |
| Competency Satisfaction     | Pre            | 0.70*** | 0.03 | < 0.001 | 0.90 |
|                             | Feeling Topics | -0.32   | 0.29 | 0.278   | 0.00 |
|                             | Interaction    | -0.12   | 0.29 | 0.688   | 0.00 |
| Competency Dissatisfaction  | Pre            | 0.68*** | 0.03 | < 0.001 | 0.94 |

|                     |                |         |      |         |      |
|---------------------|----------------|---------|------|---------|------|
|                     | Feeling Topics | 0.28    | 0.28 | 0.314   | 0.00 |
|                     | Interaction    | 0.54    | 0.28 | 0.051   | 0.00 |
| Relatedness Overall | Pre            | 0.82*** | 0.03 | < 0.001 | 1.49 |
|                     | Feeling Topics | -0.46   | 0.26 | 0.082   | 0.01 |
|                     | Interaction    | 0.28    | 0.26 | 0.284   | 0.01 |
| Autonomy Overall    | Pre            | 0.80*** | 0.03 | < 0.001 | 1.30 |
|                     | Feeling Topics | -0.33   | 0.27 | 0.224   | 0.00 |
|                     | Interaction    | 0.19    | 0.28 | 0.485   | 0.00 |
| Competency Overall  | Pre            | 0.78*** | 0.03 | < 0.001 | 1.50 |
|                     | Feeling Topics | -0.40   | 0.25 | 0.114   | 0.00 |
|                     | Interaction    | 0.52*   | 0.26 | 0.044   | 0.00 |

*Note.* Estimates represent unstandardized regression weights in pre-intervention standard deviation units. Effect size is Cohen's  $f^2$  and can be interpreted as small = 0.02, medium = 0.15, large = 0.35.

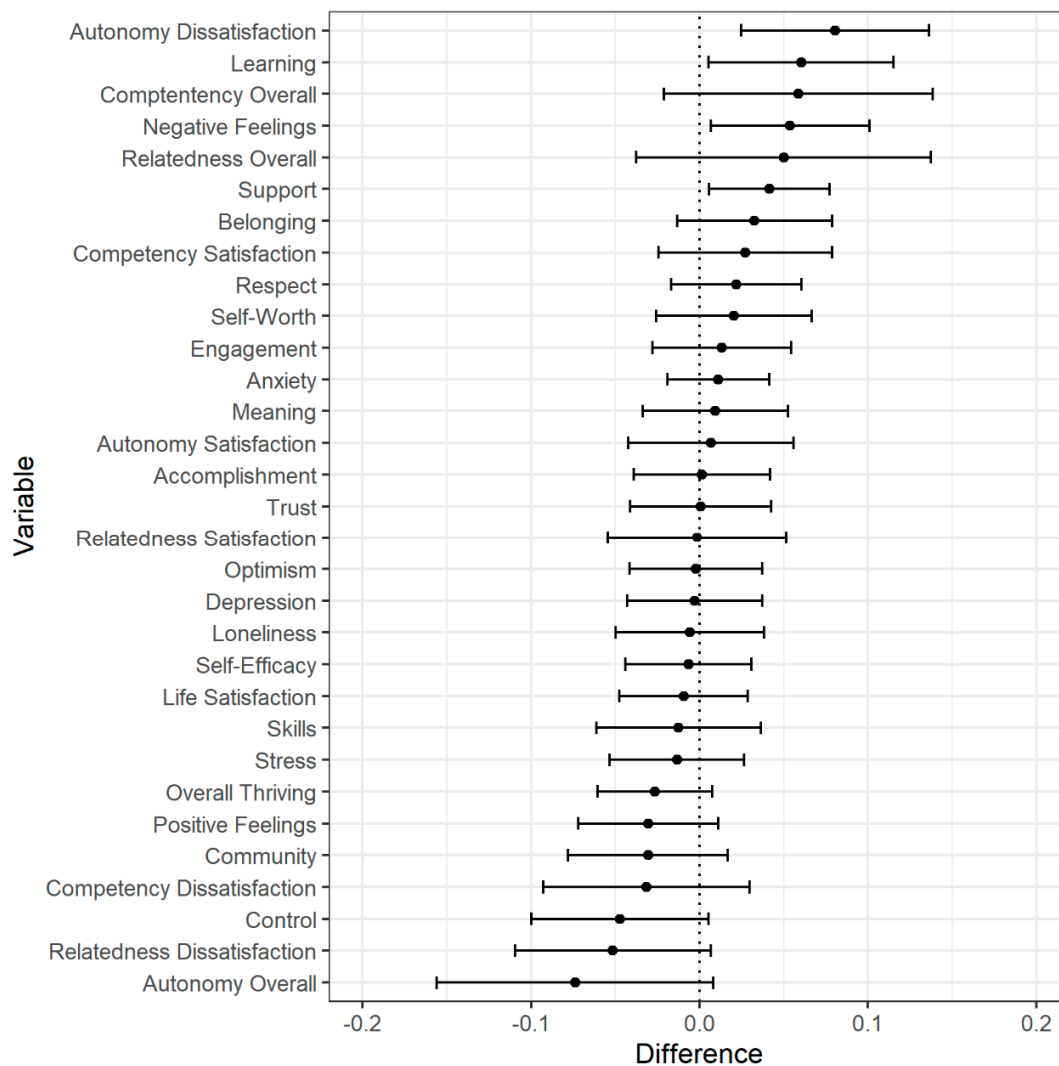

*Supplementary Figure S1.* Changes in well-being indices before and after the intervention.

*Note.* Estimates are differences (Post – Pre) in scale units with 95% confidence intervals.

Positive values indicate increases in the outcome; negative values indicate decreases in the outcome.

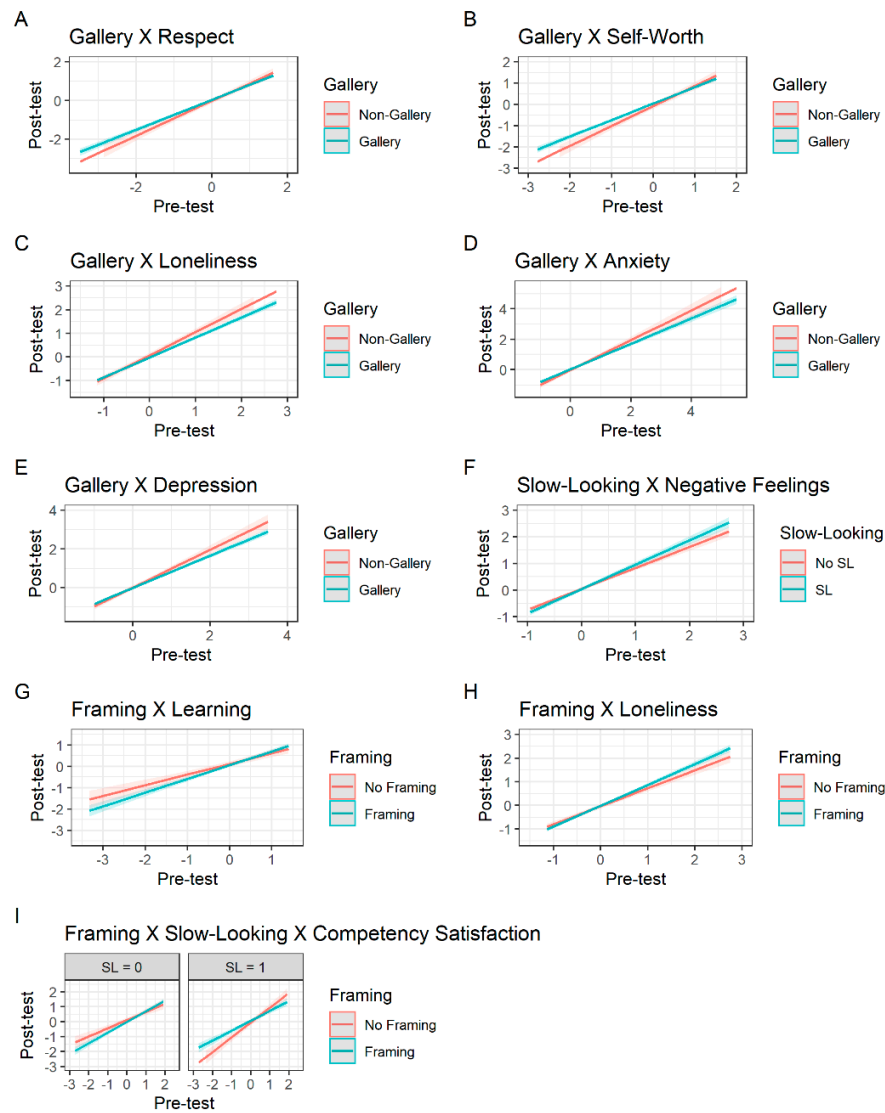

*Supplementary Figure S2. Interactions between experimental condition and pre-test flourishing predicting post-test flourishing*
